# Supplementary material for: Distinct T cell subsets in adipose tissue are associated with obesity
Source: PubMed Central journal article supplement — Eur J Immunol. 2022 Dec 13;53(2):2249990. doi: 10.1002/eji.202249990 (PMC10107125; doi:10.1002/eji.202249990), 2022-12-13
Supplement: EJI-53-0-s001.pdf [file EJI-53-0-s001.pdf]

## **Supporting Information**

### **Distinct T cell subsets in adipose tissue are associated with obesity**

Martha E. Haugstøyl, Martin Cornillet, Kristina Strand, Natalie Stiglund, Dan Sun, Laurence Lawrence-Archer, Iren D. Hjellestad, Ernesto Sparrelid, Christian Busch, Jøran Hjelmæsæth, Jens K. Hertel, Andrea Ponzetta, Gunnar Mellgren, Johan Fernø, Niklas K. Björkström

## **Supplementary material and methods**

### **Patient samples**

#### *Liposuction aspirates and buffy coat blood from non-obese donors*

For the proteomic screening, abdominal SAT was collected from subjects undergoing cosmetic or post weight loss liposuction (cohort 1, n=6). Buffy coat blood from anonymous donors at the Department of immunology and transfusion medicine, Haukeland University Hospital was also used in the screening and as internal controls.

#### *Bariatric surgery patients*

This study included three independent patient cohorts of obese individuals undergoing bariatric surgery at Voss Hospital (cohort 2, 3 and 4) and one cohort of obese individuals undergoing bariatric surgery at Karolinska Institutet in Stockholm (cohort 5). Cohort 2 was used for the explorative phenotyping of CD3<sup>+</sup> T cells (n=43), cohort 3 for the in-depth characterization of T cell subsets (n=6), and cohort 4 for the T cell functional characterization (n=6). Overview of available patient characteristics and biochemical measurements are listed in Table 1. Heparin blood and subcutaneous and visceral adipose tissue biopsies were obtained from all patients at the time of surgery. Samples were stored in Krebs Ringer Phosphate (KRP) buffer and sent to Haukeland University Hospital immediately after collection for further processing. Cohort 5 was used for the RNA sequencing of circulating effector memory CD8<sup>+</sup> T cells. Blood samples were taken from patients undergoing bariatric surgery at the day of surgery and one year after.

#### *Lean subjects*

Two independent groups of lean subjects were included in this study. For the characterization of T cell subsets by flow cytometry (cohort 4), matched heparin blood and visceral adipose tissue samples were collected from patients (n=6) diagnosed with intracellulapapillary mucosal neoplasm (IPMN, a premalignant pancreatic lesion found in otherwise healthy

individuals). For the transcriptional characterization of blood T cells by RNA sequencing (cohort 5), blood was collected from healthy individuals (n=5).

### **Isolation of stromal vascular cells**

Subcutaneous and visceral adipose tissue biopsies were cut in pieces with a scalpel and enzymatically digested with Collagenase Type I (Life Technologies, 0.66 mg/ml) for approximately 1 hour at 37°C. Liposuction aspirates were washed in 0.9% NaCl, diluted in KRP buffer (1:1) before enzymatically digested with Liberase (Roche, 0.078 Wunsch units/ml) for 1 hour at 37°C with shaking. The digested tissues were filtered and left to allow separation of the stromal vascular cells (SVC) from the mature adipocytes (10-20 min). The SVC was washed with phosphate-buffered saline (PBS) and centrifuged (300 x g, 5 min) before removing the supernatant. The SVC from liposuction was treated with red blood cell lysis buffer and freshly stained for the proteome screening. The SVC from tissue biopsies were cryopreserved in freezing media (FBS with 10 % DMSO) until flow cytometry experiments were performed.

### **Surface proteome screening in blood and adipose tissue**

LegendScreen™ Human PE Kit (Cat#700007, Biolegend) was applied to screen the surface of T cells for 315 proteins. Antibody barcoding was performed to enable separation of PBMC and SVF. PBMC from the healthy donors were stained with BV605 CD45 (Cat#304044) and SAT SVC from liposuction aspirates were stained with AF700 CD45 (Cat#304024). The samples were mixed and stained with a backbone panel including the following antibodies: APC-Cy7 HLA-DR (Cat#307617) and BV570 CD3 (Cat#300436) from Biolegend, BV786 CD16 (Cat#563690) and PE-CF594 CD56 (Cat# 564849) from BD Biosciences. The cells were subjected to the plates provided by the kit and the experiment was performed according to the manufacturer's protocol. The samples were acquired on the BD Fortessa instrument and the obtained data was analyzed using FlowJo v10.

## **Antibody staining and flow cytometry**

Frozen PBMC and SVF samples were thawed and stained for 29-parameter flow cytometry. In summary, the cells were stained for 25 min with the extracellular antibodies Biotin CD25 (Cat#302624), BV421 CCR7 (Cat#353208), BV510 CD123 (Cat#306022), PE CD26 (Cat# 302706) and PE-Cy7 CD127 (Cat# 351320) from Biolegend and BUV496 CD8a (Cat#564804), BUV563 CD45RA (Cat#565702), BUV615 CD49a (Cat#624297), BUV661 CD38 (Cat#612969), BUV737 CD69 (Cat#612817), BUV805 CD45 (Cat#612891), BB660 CD103 (Cat#624295), BB700 CD31 (Cat#746116), APC-Cy7 CCR5 (Cat#557755), V500 CD14 (Cat#561391), BV510 CD19 (Cat#562947), BV605 CLA (Cat# 563960), BV650 CD39 (Cat#563681), BV711 Sialyl Lewis<sup>x</sup> (Cat# 563910), BV750 CD4 (Cat# 566355), BV785 CD3 (Cat# 563800) and PE-Cy5 CD54 (Cat# 555512) from BD Biosciences, BB515 CD49e (Cat#130-110-534) from Miltenyi and PE-Cy5.5 CD28 (Cat# B24027) from Beckman Coulter. Dead Cell Marker Aqua (Cat# L34957, ThermoFisher) was used to stain dead cells. FcR Blocking Reagent (Cat# 130-059-901, Miltenyi Biotec) was added to the mix to remove potential background signals. After washing, the cells were stained for 25 min with BB630 Streptavidin (Cat# 624294, BD Biosciences) followed by washing and 1 hour fixation/permeabilization. The cells were stained for 45 minutes with an intracellular antibody mix containing the following antibodies. From BD Biosciences: BUV395 Ki67 (Cat# 564071), BB755-P Perforin (Cat# 624391, BD Horizon custom reagents), BB790-P Granzyme B (Cat# 624296, BD Horizon custom reagents). From eBioscience: eF660 Eomes (Cat# 50-4877-41), AF700 FoxP3 (Cat# 56-4776-41) and PE-Dazzle594 T-bet (Cat# 644828, Biolegend). After washing, the cells were kept in FACS buffer for immediate acquisition on the flow cytometer (BD Symphony A5) containing 5 lasers (355, 405, 488, 561 and 637 nm). Data was analyzed using Flowjo v10 (Treestar).

### **Dimension reduction analysis**

The FlowJo plugins Uniform Manifold Approximation and Projection (UMAP) and PhenoGraph were applied to visualize the single cell flow cytometry data in a high dimensional structure. To this end, CD3<sup>+</sup> T cells from blood and VAT from lean (n=6) and obese (n=6) was electronically barcoded for patient type and tissue of origin. Samples from the same patient group (“lean” or “obese”) and tissue type (blood or VAT) were concatenated and downsampled (DownSample plugin) to 26,404 events per sample for an equal number of cell input. The four files generated were concatenated to a final file that was analyzed for UMAP and Phenograph. UMAP was run using the default settings (Euclidean distance function, nearest neighbors: 15 and minimum distance: 0.5). PhenoGraph was run using the default number of nearest neighbors (K = 30). The parameter input in both analyses were the 25 phenotypic markers of interest.

### **Multifunctional T cell assay**

Frozen PBMC and SVF from SAT and VAT were thawed and rested in complete media (RPMI +10% FBS, + L-Glutamine) for 1 hour. T cells were stimulated with anti-CD3 and anti-CD28 beads (5:2 bead:cell) (Cat# 11131D, Thermo Fisher). PMA and Ionomycin (Cat# 00-4970-03, Thermo Fisher) were used as positive controls. The cells were kept at 37°C during the incubation. GolgiPlug (Brefeldin A, Cat#555029, BD Biosciences) and GolgiStop (Monesin, Cat#554724, BD Biosciences) were added after 1 hour to block the intracellular protein transport processes. The cells were then stimulated for additional 5 hours before antibody staining for flow cytometry. The staining was performed as described in the previous section with APC-Cy7 CD45 (Cat# 304014), biotin CD45RA (Cat# 304104), BV605 CD8a (Cat# 301040), PE-Cy5 CD3 (Cat# 300410), FITC IL22 (Cat# 366712), AF700 IL17 (Cat# 512318), BV650 TNF (Cat# 502938) and BV711 IFN $\gamma$  (Cat# 502540) from Biolegend and BV421 CD49e (Cat# 740077), V500 CD14 (Cat# 561391), BV510 CD19 (Cat# 562947), BV786 CD16

(Cat# 563690), PE-CF594 CD26 (Cat# 565158), PE-Cy7 CD4 (Cat# 344612), AF647 Granzyme B (Cat# 560212) and PE MIP-1 $\beta$  (Cat# 550078) from BD Biosciences. From Thermo Fisher: QD585 Streptavidin (Cat# Q10113MP), FITC IL22 (Cat# 11-7229-42) and PE-Cy5.5 CD56 (Cat# A79388, Beckman Coulter).

### **RNaseq data analysis**

RNA-seq reads were trimmed by TrimGalore 0.6.1 with '-q 30' and aligned to the human GRCh38 reference genome by HISAT 2.2.1. Reads were filtered by SAMTools 1.12 with the '-f 2 -F 4 -q 60' options to retain only uniquely mapped reads, and per gene counts were then quantified by StringTie 2.1.4. Differentially expressed genes (DEGs) between lean and obese, obese and post-surgery, as well as between lean and post-surgery samples were detected by DESeq2 1.34.0 (adjusted p-values < 0.05). Euler diagrams across DEGs of different comparisons were generated by Eulerr 6.1.1, and heatmaps were drawn by ComplexHeatmap 2.10.0 in R 4.1.1. Differentially activated pathways between obese and post-surgery samples were determined by Ingenuity Pathways Analysis (IPA) version 01-20-04, and only canonical pathways with FDR-adjusted p-values < 0.05 and absolute values of Z-scores  $\geq 2$  were retained.

## Supplementary Figure legends

**Supplementary Figure 1.** Expression of surface proteins on T cells in blood and adipose tissue. Heatmap is based on the percentage of cells expressing each surface protein, with a cut-off of minimum 20 % expression in at least one compartment.

**Supplementary Figure 2.** Expression of NK cell-specific proteins T cells. Box-and-whisker plots showing percentage of CD3<sup>+</sup> T cells expressing NKG2D, NKG2A, NKp46, Bcl2 and KIRs in PBMC, SAT and VAT from individuals with obesity (cohort 2). Line represents median and the whiskers represent the minimum and maximum value. The Wilcoxon matched-paired sign rank test was used for comparison between groups. (\*) indicates significant difference relative to blood unless otherwise specified. \*\*p<0.01, \*\*\*p<0.001.

**Supplementary Figure 3.** (A) Heatmaps showing expression patterns of differentially expressed genes (DEGs) between lean and obese (left) and obese pre- and post-bariatric surgery (right). (B) Heatmap showing 40 DEGs overlapping between lean vs. obese and obese vs. post groups.

**Supplementary Figure 4.** Relative abundance and protein expression on naïve and memory T cell subsets. (A) Pie charts showing relative abundance of naïve (CCR7<sup>+</sup>CD45RA<sup>+</sup>), central memory T (T<sub>CM</sub>, CCR7<sup>+</sup>CD45RA<sup>-</sup>) cells, effector memory T (T<sub>EM</sub>, CCR7<sup>-</sup>CD45RA<sup>-</sup>) cells and terminally differentiated T (T<sub>EMRA</sub>, CCR7<sup>-</sup>CD45RA<sup>+</sup>) cells within the CD4<sup>+</sup> and CD8<sup>+</sup> T cell population in blood and adipose tissue from individuals with obesity (n=6) and from lean subjects (n=6) (cohort 3). (B-C) Bar graphs showing protein expression on naïve and memory subsets within the (B) CD4<sup>+</sup> and (C) CD8<sup>+</sup> T cell population.

**Supplementary Figure 5.** Protein expression on Tregs in blood and adipose tissue of lean subjects (n=6) and individuals with obesity (n=6). Box-and-whisker plots showing percentage

of cells expressing the indicated proteins. Line represents median and whiskers represent min and max value.

**Supplementary Figure 6.** Representative histogram plots showing protein expression intensities on concatenated CD3<sup>+</sup> T cells from blood and subcutaneous adipose tissue (SAT) from lean subjects and individuals with obesity (cohort 3).

**Supplementary Figure 7.** UMAP plot of concatenated CD3<sup>+</sup> T cells from blood and subcutaneous adipose tissue (SAT) from lean subjects and individuals with obesity (cohort 3).

**Supplementary Figure 8.** Functional T cell assay. **(A)** Bar graphs showing CD4<sup>+</sup> and CD8<sup>+</sup> T cell protein responses in PBMC, SAT and VAT of individuals with obesity (cohort 4) for the indicated stimulations. **(B)** Expression of TNF and IFN $\gamma$  in response to anti-CD3/CD28 stimulation on CD26<sup>-</sup> and CD26<sup>+</sup> T cells (total, CD4<sup>+</sup> and CD8<sup>+</sup> T cells).

**Supplementary Figure 9.** Box-and-whisker plots showing percentages of CD26<sup>-</sup> (blue) and CD26<sup>+</sup> (red) CD4<sup>+</sup> T cells expressing the indicated proteins in blood, SAT and VAT of individuals with obesity (cohort 3). The Wilcoxon matched-paired sign rank test was used for comparison between groups. (\*) indicates significant difference between CD26<sup>-</sup> and CD26<sup>+</sup> T cells within the same compartment. \*p<0.05.





### Supplementary Figure 3

A

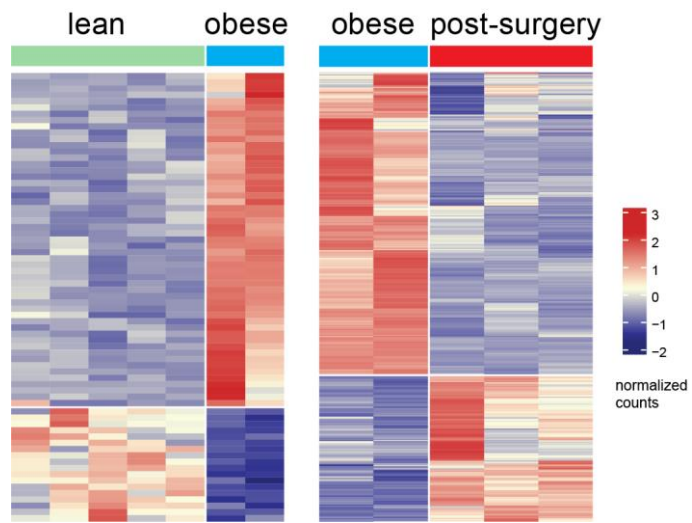

B

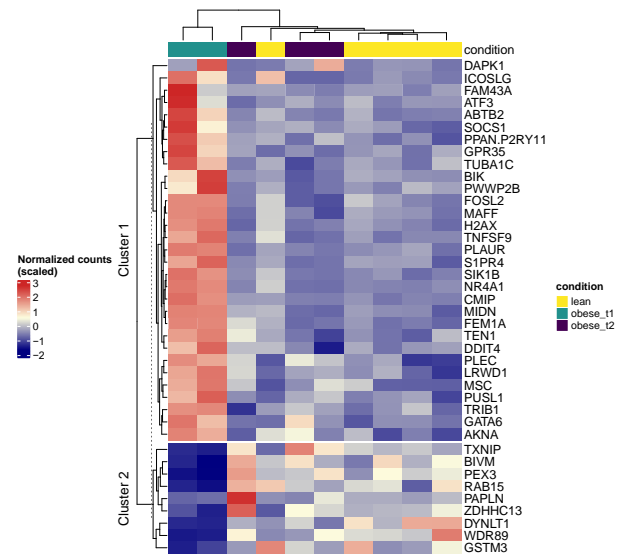

# Supplementary Figure 4

**A**

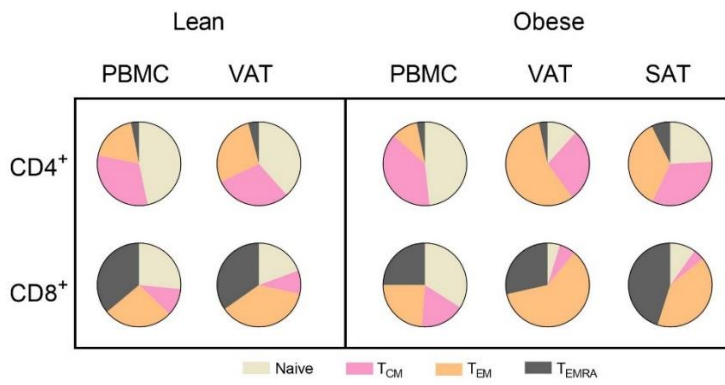

**B**

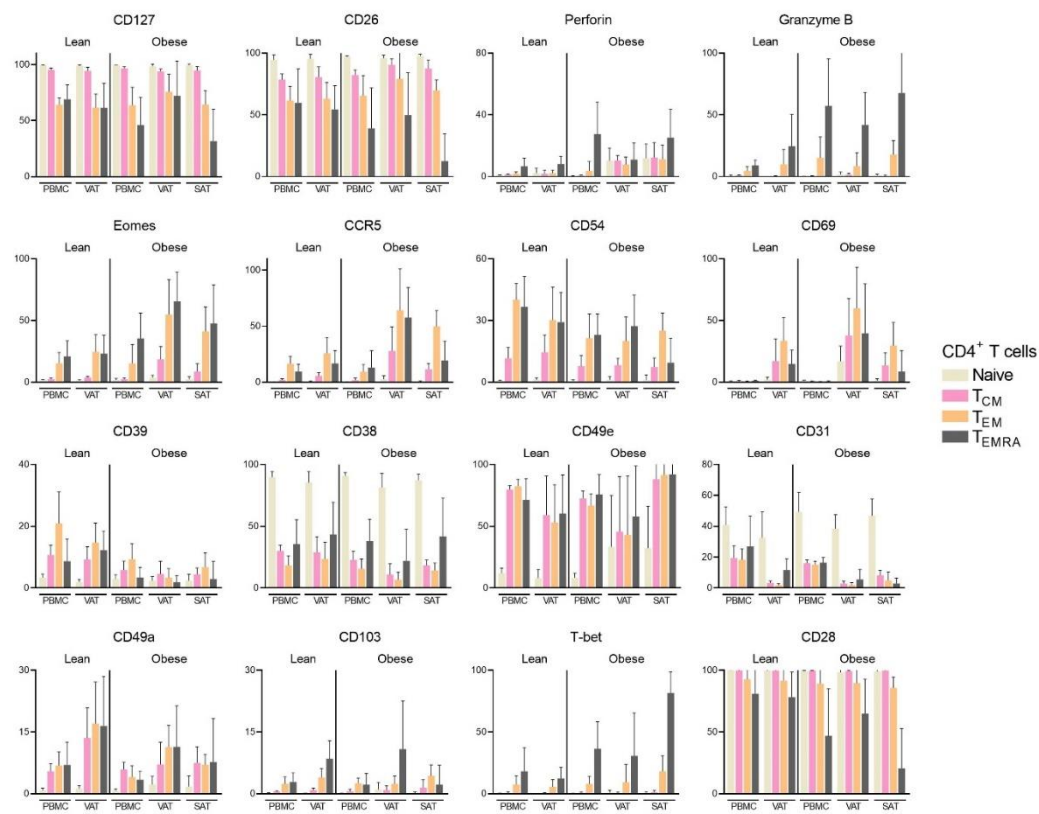

C

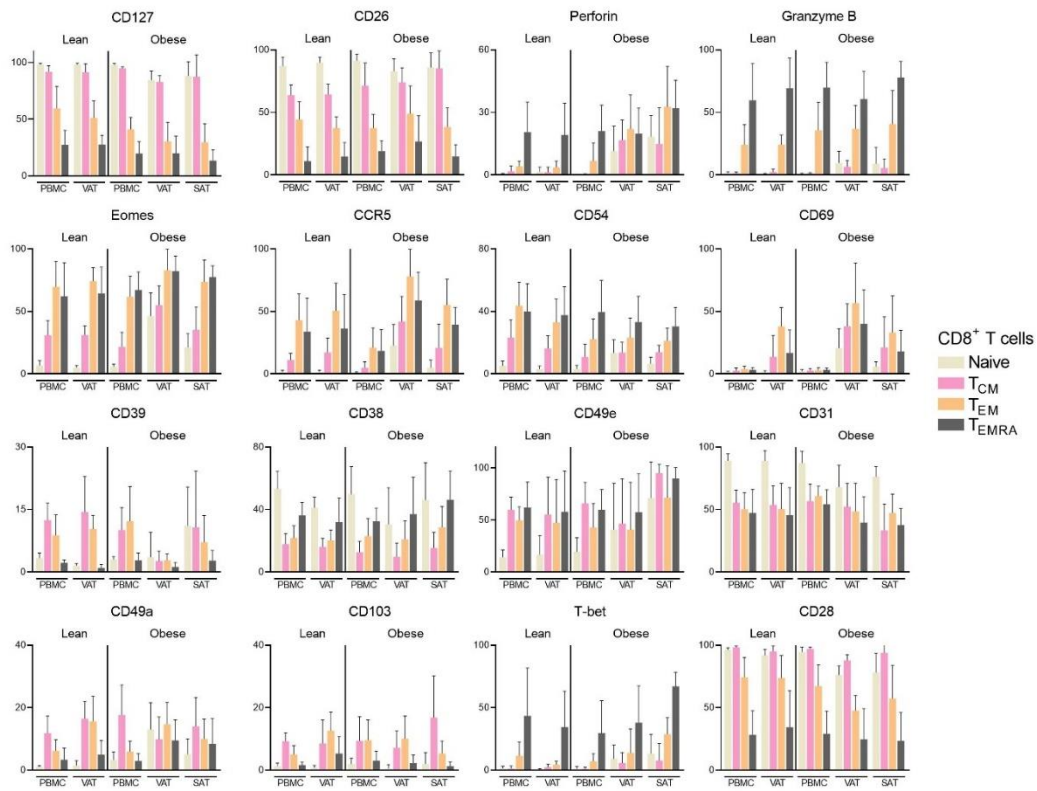

Supplementary Figure 5

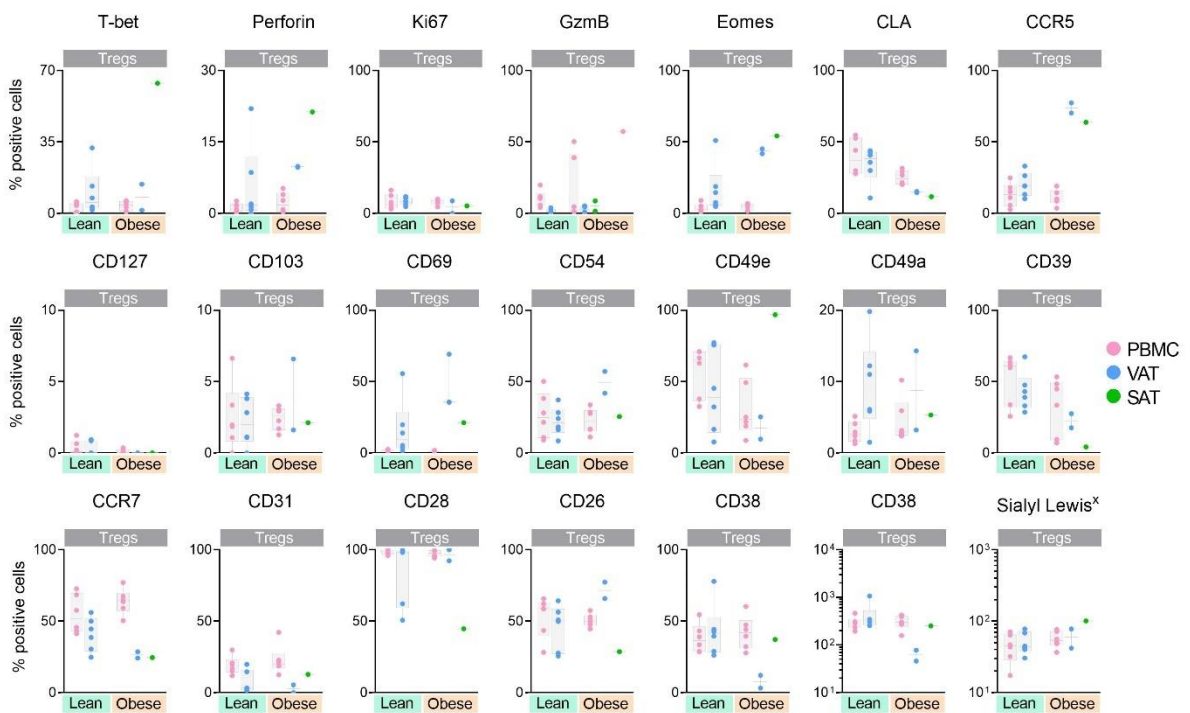

## Supplementary Figure 6

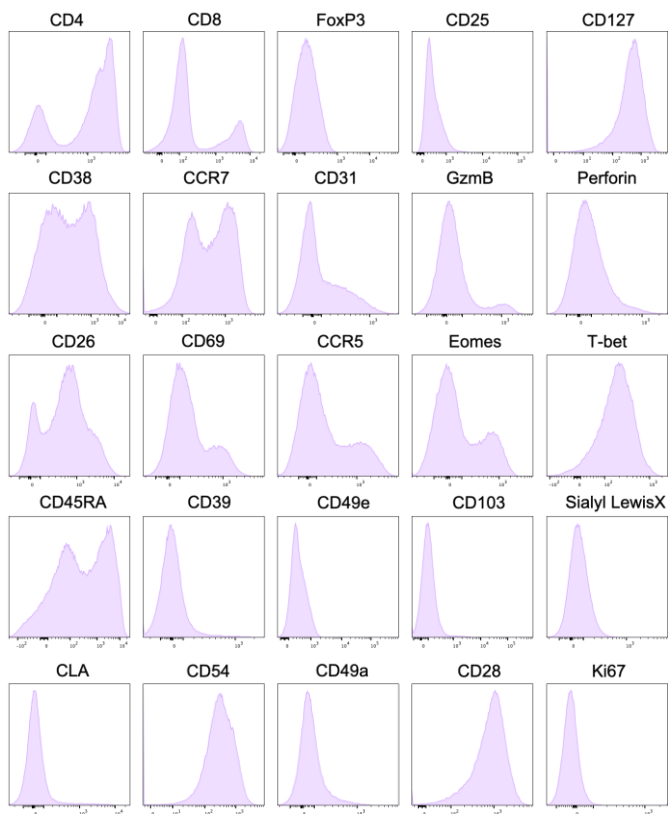

## Supplementary Figure 7

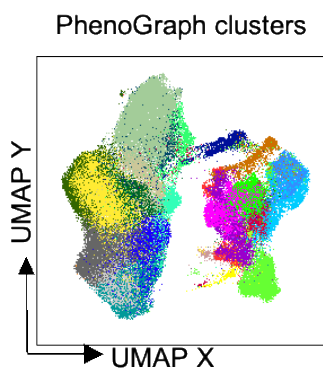

| Sample Name              | Subset Name        | Count |
|--------------------------|--------------------|-------|
| concat_1_Final_Tcell.fcs | Phenograph_33FO_27 | 1373  |
| concat_1_Final_Tcell.fcs | Phenograph_33FO_26 | 10386 |
| concat_1_Final_Tcell.fcs | Phenograph_33FO_25 | 3443  |
| concat_1_Final_Tcell.fcs | Phenograph_33FO_24 | 1311  |
| concat_1_Final_Tcell.fcs | Phenograph_33FO_23 | 1739  |
| concat_1_Final_Tcell.fcs | Phenograph_33FO_22 | 600   |
| concat_1_Final_Tcell.fcs | Phenograph_33FO_21 | 1853  |
| concat_1_Final_Tcell.fcs | Phenograph_33FO_20 | 3400  |
| concat_1_Final_Tcell.fcs | Phenograph_33FO_19 | 1431  |
| concat_1_Final_Tcell.fcs | Phenograph_33FO_18 | 1385  |
| concat_1_Final_Tcell.fcs | Phenograph_33FO_17 | 3781  |
| concat_1_Final_Tcell.fcs | Phenograph_33FO_16 | 2089  |
| concat_1_Final_Tcell.fcs | Phenograph_33FO_15 | 1755  |
| concat_1_Final_Tcell.fcs | Phenograph_33FO_14 | 146   |
| concat_1_Final_Tcell.fcs | Phenograph_33FO_13 | 6194  |
| concat_1_Final_Tcell.fcs | Phenograph_33FO_12 | 2351  |
| concat_1_Final_Tcell.fcs | Phenograph_33FO_11 | 1317  |
| concat_1_Final_Tcell.fcs | Phenograph_33FO_10 | 10168 |
| concat_1_Final_Tcell.fcs | Phenograph_33FO_9  | 260   |
| concat_1_Final_Tcell.fcs | Phenograph_33FO_8  | 17538 |
| concat_1_Final_Tcell.fcs | Phenograph_33FO_7  | 4513  |
| concat_1_Final_Tcell.fcs | Phenograph_33FO_6  | 219   |
| concat_1_Final_Tcell.fcs | Phenograph_33FO_5  | 14068 |
| concat_1_Final_Tcell.fcs | Phenograph_33FO_4  | 5209  |
| concat_1_Final_Tcell.fcs | Phenograph_33FO_3  | 739   |
| concat_1_Final_Tcell.fcs | Phenograph_33FO_2  | 2078  |
| concat_1_Final_Tcell.fcs | Phenograph_33FO_1  | 6270  |

## Supplementary Figure 8

**A:**

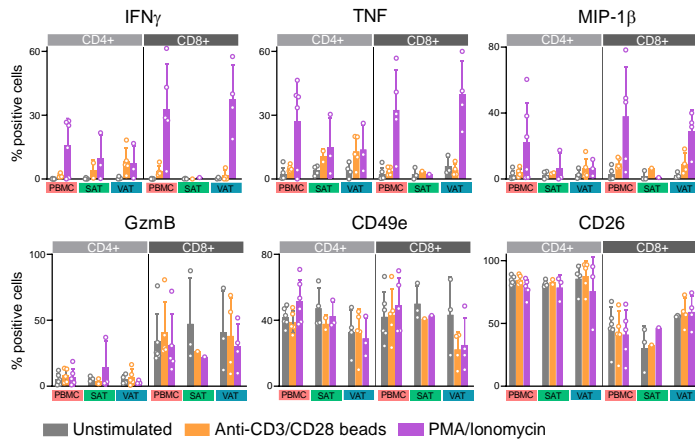

**B:**

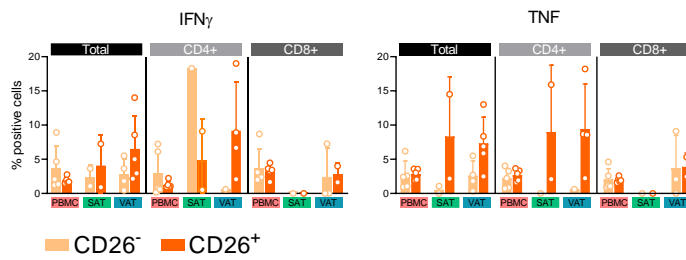

## Supplementary Figure 9

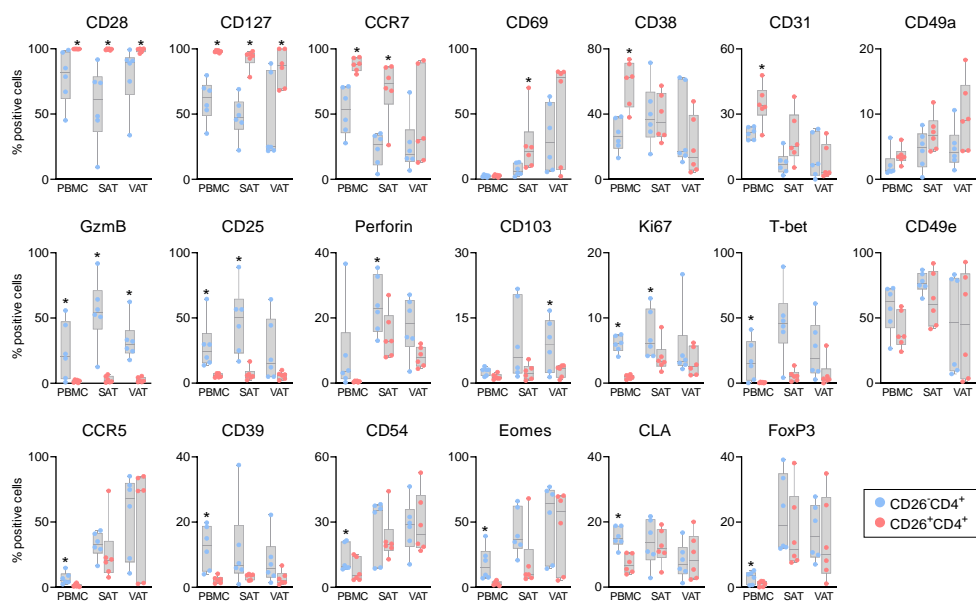

## Supplementary Figure 1

### T1 vs Lean

| GeneID          | Cluster  | hgnc_symbol |
|-----------------|----------|-------------|
| ENSG00000196730 | cluster1 | DAPK1       |
| ENSG00000100290 | cluster1 | BIK         |
| ENSG00000171813 | cluster1 | PWWP2B      |
| ENSG00000204574 | cluster1 | ABCF1       |
| ENSG00000106948 | cluster1 | AKNA        |
| ENSG00000141965 | cluster1 | FEM1A       |
| ENSG00000185022 | cluster1 | MAFF        |
| ENSG00000167470 | cluster1 | MIDN        |
| ENSG00000188486 | cluster1 | H2AX        |
| ENSG00000075426 | cluster1 | FOSL2       |
| ENSG00000153815 | cluster1 | CMIP        |
| ENSG00000122877 | cluster1 | EGR2        |
| ENSG00000275993 | cluster1 | SIK1B       |
| ENSG00000123358 | cluster1 | NR4A1       |
| ENSG00000178860 | cluster1 | MSC         |
| ENSG00000213366 | cluster1 | GSTM2       |
| ENSG00000084652 | cluster1 | TXLNA       |
| ENSG00000173334 | cluster1 | TRIB1       |
| ENSG00000011422 | cluster1 | PLAUR       |
| ENSG00000188290 | cluster1 | HES4        |
| ENSG00000141448 | cluster1 | GATA6       |
| ENSG00000104976 | cluster1 | SNAPC2      |
| ENSG00000183655 | cluster1 | KLHL25      |
| ENSG00000170271 | cluster1 | FAXDC2      |
| ENSG00000169972 | cluster1 | PUSL1       |
| ENSG00000125910 | cluster1 | S1PR4       |
| ENSG00000184967 | cluster1 | NOC4L       |
| ENSG00000262814 | cluster1 | MRPL12      |
| ENSG00000171161 | cluster1 | ZNF672      |
| ENSG00000178209 | cluster1 | PLEC        |
| ENSG00000161036 | cluster1 | LRWD1       |
| ENSG00000130810 | cluster1 | PPAN        |
| ENSG00000242802 | cluster1 | AP5Z1       |
| ENSG00000137801 | cluster1 | THBS1       |
| ENSG00000168209 | cluster1 | DDIT4       |
| ENSG00000125657 | cluster1 | TNFSF9      |
| ENSG00000149823 | cluster1 | VPS51       |
| ENSG00000257949 | cluster1 | TEN1        |
| ENSG00000035664 | cluster1 | DAPK2       |
| ENSG00000185112 | cluster1 | FAM43A      |
| ENSG00000162772 | cluster1 | ATF3        |
| ENSG00000138623 | cluster1 | SEMA7A      |
| ENSG00000105298 | cluster1 | CACTIN      |
| ENSG00000160214 | cluster1 | RRP1        |
| ENSG00000243207 | cluster1 | PPAN-P2RY11 |
| ENSG00000185338 | cluster1 | SOCS1       |
| ENSG00000166016 | cluster1 | ABTB2       |
| ENSG00000119508 | cluster1 | NR4A3       |
| ENSG00000156966 | cluster1 | B3GNT7      |
| ENSG00000108821 | cluster1 | COL1A1      |
| ENSG00000178623 | cluster1 | GPR35       |
| ENSG00000167553 | cluster1 | TUBA1C      |
| ENSG00000160223 | cluster1 | ICOSLG      |
| ENSG00000237440 | cluster2 | ZNF737      |
| ENSG00000163599 | cluster2 | CTLA4       |
| ENSG00000159882 | cluster2 | ZNF230      |
| ENSG00000139998 | cluster2 | RAB15       |
| ENSG00000134202 | cluster2 | GSTM3       |
| ENSG00000164830 | cluster2 | OXR1        |
| ENSG00000134243 | cluster2 | SORT1       |
| ENSG00000169031 | cluster2 | COL4A3      |
| ENSG00000134897 | cluster2 | BIVM        |
| ENSG00000034693 | cluster2 | PEX3        |
| ENSG00000265972 | cluster2 | TXNIP       |
| ENSG00000146425 | cluster2 | DYNLT1      |
| ENSG00000119977 | cluster2 | TCTN3       |
| ENSG00000176624 | cluster2 | MEX3C       |
| ENSG00000177054 | cluster2 | ZDHHC13     |
| ENSG00000100767 | cluster2 | PAPLN       |
| ENSG00000163629 | cluster2 | PTPN13      |
| ENSG00000140006 | cluster2 | WDR89       |

## Supplementary Figure 1

### T1 vs T2

| GeneID          | Cluster  | hgnc_symbol |
|-----------------|----------|-------------|
| ENSG00000174579 | cluster1 | MSL2        |
| ENSG00000140455 | cluster1 | USP3        |
| ENSG00000285976 | cluster1 |             |
| ENSG00000163519 | cluster1 | TRAT1       |
| ENSG00000164211 | cluster1 | STARD4      |
| ENSG00000197121 | cluster1 | PGAP1       |
| ENSG00000162772 | cluster1 | ATF3        |
| ENSG00000118515 | cluster1 | SGK1        |
| ENSG00000126860 | cluster1 | EVI2A       |
| ENSG00000179820 | cluster1 | MYADM       |
| ENSG00000149212 | cluster1 | SESN3       |
| ENSG00000185112 | cluster1 | FAM43A      |
| ENSG00000140564 | cluster1 | FURIN       |
| ENSG00000163600 | cluster1 | ICOS        |
| ENSG00000184678 | cluster1 | H2BC21      |
| ENSG00000122644 | cluster1 | ARL4A       |
| ENSG00000148840 | cluster1 | PPRC1       |
| ENSG00000185338 | cluster1 | SOCS1       |
| ENSG00000076706 | cluster1 | MCAM        |
| ENSG00000095951 | cluster1 | HIVEP1      |
| ENSG00000164920 | cluster1 | OSR2        |
| ENSG00000154319 | cluster1 | FAM167A     |
| ENSG00000181744 | cluster1 | DIPK2A      |
| ENSG00000131459 | cluster1 | GFPT2       |
| ENSG00000101187 | cluster1 | SLCO4A1     |
| ENSG00000077150 | cluster1 | NFKB2       |
| ENSG00000078804 | cluster1 | TP53INP2    |
| ENSG00000107130 | cluster1 | NCS1        |
| ENSG00000125089 | cluster1 | SH3TC1      |
| ENSG00000124466 | cluster1 | LYPD3       |
| ENSG00000126353 | cluster1 | CCR7        |
| ENSG00000112486 | cluster1 | CCR6        |
| ENSG00000110721 | cluster1 | CHKA        |
| ENSG00000160789 | cluster1 | LMNA        |
| ENSG00000120694 | cluster1 | HSPH1       |
| ENSG00000134294 | cluster1 | SLC38A2     |
| ENSG00000241945 | cluster1 | PWP2        |
| ENSG00000221869 | cluster1 | CEBPD       |
| ENSG00000196781 | cluster1 | TLE1        |
| ENSG00000121152 | cluster1 | NCAPH       |
| ENSG00000133639 | cluster1 | BTG1        |
| ENSG00000100368 | cluster1 | CSF2RB      |
| ENSG00000197061 | cluster1 | H4C3        |
| ENSG00000110046 | cluster1 | ATG2A       |
| ENSG00000086061 | cluster1 | DNAJA1      |
| ENSG00000157954 | cluster1 | WIPI2       |
| ENSG00000269858 | cluster1 | EGLN2       |



|                 |          |             |
|-----------------|----------|-------------|
| ENSG00000067064 | cluster1 | IDI1        |
| ENSG00000132912 | cluster1 | DCTN4       |
| ENSG00000106993 | cluster1 | CDC37L1     |
| ENSG00000152700 | cluster1 | SAR1B       |
| ENSG00000103168 | cluster1 | TAF1C       |
| ENSG00000173762 | cluster1 | CD7         |
| ENSG00000188897 | cluster1 |             |
| ENSG00000168438 | cluster1 | CDC40       |
| ENSG00000157540 | cluster1 | DYRK1A      |
| ENSG00000155903 | cluster1 | RASA2       |
| ENSG00000099337 | cluster1 | KCNK6       |
| ENSG00000127418 | cluster1 | FGFRL1      |
| ENSG00000129933 | cluster1 | MAU2        |
| ENSG00000137166 | cluster1 | FOXP4       |
| ENSG00000146676 | cluster1 | PURB        |
| ENSG00000070770 | cluster1 | CSNK2A2     |
| ENSG00000188636 | cluster1 | RTL6        |
| ENSG00000168615 | cluster1 | ADAM9       |
| ENSG00000140691 | cluster1 | ARMC5       |
| ENSG00000006459 | cluster1 | KDM7A       |
| ENSG00000173926 | cluster1 | MARCHF3     |
| ENSG00000163607 | cluster1 | GTPBP8      |
| ENSG00000166484 | cluster1 | MAPK7       |
| ENSG00000116704 | cluster1 | SLC35D1     |
| ENSG00000090621 | cluster1 | PABPC4      |
| ENSG00000213079 | cluster1 | SCAF8       |
| ENSG00000144566 | cluster1 | RAB5A       |
| ENSG00000171368 | cluster1 | TPPP        |
| ENSG00000166233 | cluster1 | ARIH1       |
| ENSG00000145901 | cluster1 | TNIP1       |
| ENSG00000101557 | cluster1 | USP14       |
| ENSG00000104419 | cluster1 | NDRG1       |
| ENSG00000115525 | cluster1 | ST3GAL5     |
| ENSG00000099995 | cluster1 | SF3A1       |
| ENSG00000172716 | cluster1 | SLFN11      |
| ENSG00000167548 | cluster1 | KMT2D       |
| ENSG00000081320 | cluster1 | STK17B      |
| ENSG00000164040 | cluster1 | PGRMC2      |
| ENSG00000104064 | cluster1 | GABPB1      |
| ENSG00000108094 | cluster1 | CUL2        |
| ENSG00000127948 | cluster1 | POR         |
| ENSG00000006634 | cluster1 | DBF4        |
| ENSG00000116604 | cluster1 | MEF2D       |
| ENSG00000105321 | cluster1 | CCDC9       |
| ENSG00000243207 | cluster1 | PPAN-P2RY11 |
| ENSG00000125968 | cluster1 | ID1         |
| ENSG00000116095 | cluster1 | PLEKHA3     |
| ENSG00000102678 | cluster1 | FGF9        |
| ENSG00000101199 | cluster1 | ARFGAP1     |
| ENSG00000182831 | cluster1 | C16orf72    |

|                 |          |          |
|-----------------|----------|----------|
| ENSG00000157933 | cluster1 | SKI      |
| ENSG00000103966 | cluster1 | EHD4     |
| ENSG00000102606 | cluster1 | ARHGEF7  |
| ENSG00000163635 | cluster1 | ATXN7    |
| ENSG00000088899 | cluster1 | LZTS3    |
| ENSG00000188483 | cluster1 | IER5L    |
| ENSG00000167325 | cluster1 | RRM1     |
| ENSG00000130940 | cluster1 | CASZ1    |
| ENSG00000151136 | cluster1 | BTBD11   |
| ENSG00000004399 | cluster1 | PLXND1   |
| ENSG00000163606 | cluster1 | CD200R1  |
| ENSG00000172071 | cluster1 | EIF2AK3  |
| ENSG00000008294 | cluster1 | SPAG9    |
| ENSG00000169710 | cluster1 | FASN     |
| ENSG00000165572 | cluster1 | KBTBD6   |
| ENSG00000186174 | cluster1 | BCL9L    |
| ENSG00000150990 | cluster1 | DHX37    |
| ENSG00000116489 | cluster1 | CAPZA1   |
| ENSG00000134987 | cluster1 | WDR36    |
| ENSG00000105325 | cluster1 | FZR1     |
| ENSG00000100796 | cluster1 | PPP4R3A  |
| ENSG00000160223 | cluster1 | ICOSLG   |
| ENSG00000108551 | cluster1 | RASD1    |
| ENSG00000196150 | cluster1 | ZNF250   |
| ENSG00000186866 | cluster1 | POFUT2   |
| ENSG00000138670 | cluster1 | RASGEF1B |
| ENSG00000101695 | cluster1 | RNF125   |
| ENSG00000104825 | cluster1 | NFKBIB   |
| ENSG00000145911 | cluster1 | N4BP3    |
| ENSG00000101665 | cluster1 | SMAD7    |
| ENSG00000105835 | cluster1 | NAMPT    |
| ENSG00000198805 | cluster1 | PNP      |
| ENSG00000155380 | cluster1 | SLC16A1  |
| ENSG00000160588 | cluster1 | MPZL3    |
| ENSG00000135241 | cluster1 | PNPLA8   |
| ENSG00000060138 | cluster1 | YBX3     |
| ENSG00000198792 | cluster1 | TMEM184B |
| ENSG00000134352 | cluster1 | IL6ST    |
| ENSG00000005486 | cluster1 | RHBDD2   |
| ENSG00000169045 | cluster1 | HNRNPH1  |
| ENSG00000179094 | cluster1 | PER1     |
| ENSG00000137267 | cluster1 | TUBB2A   |
| ENSG00000060558 | cluster1 | GNA15    |
| ENSG00000198742 | cluster1 | SMURF1   |
| ENSG00000130340 | cluster1 | SNX9     |
| ENSG00000102760 | cluster1 | RGCC     |
| ENSG00000178623 | cluster1 | GPR35    |
| ENSG00000158158 | cluster1 | CNNM4    |
| ENSG00000006652 | cluster1 | IFRD1    |
| ENSG00000115762 | cluster1 | PLEKHB2  |

|                 |          |          |
|-----------------|----------|----------|
| ENSG00000112297 | cluster1 | CRYBG1   |
| ENSG00000120709 | cluster1 | FAM53C   |
| ENSG00000023287 | cluster1 | RB1CC1   |
| ENSG00000139505 | cluster1 | MTMR6    |
| ENSG00000166825 | cluster1 | ANPEP    |
| ENSG00000119508 | cluster1 | NR4A3    |
| ENSG00000112182 | cluster1 | BACH2    |
| ENSG00000170525 | cluster1 | PFKFB3   |
| ENSG00000115902 | cluster1 | SLC1A4   |
| ENSG00000183484 | cluster1 | GPR132   |
| ENSG00000170442 | cluster1 | KRT86    |
| ENSG00000155304 | cluster1 | HSPA13   |
| ENSG00000166016 | cluster1 | ABTB2    |
| ENSG00000108821 | cluster1 | COL1A1   |
| ENSG00000131759 | cluster1 | RARA     |
| ENSG00000069849 | cluster1 | ATP1B3   |
| ENSG00000145817 | cluster1 | YIPF5    |
| ENSG00000117143 | cluster1 | UAP1     |
| ENSG00000166747 | cluster1 | AP1G1    |
| ENSG00000105281 | cluster1 | SLC1A5   |
| ENSG00000132329 | cluster1 | RAMP1    |
| ENSG00000087589 | cluster1 | CASS4    |
| ENSG00000109929 | cluster1 | SC5D     |
| ENSG00000158747 | cluster1 | NBL1     |
| ENSG00000055483 | cluster1 | USP36    |
| ENSG00000005812 | cluster1 | FBXL3    |
| ENSG00000131013 | cluster1 | PPIL4    |
| ENSG00000076604 | cluster1 | TRAF4    |
| ENSG00000197632 | cluster1 | SERPINB2 |
| ENSG00000100985 | cluster1 | MMP9     |
| ENSG00000129657 | cluster1 | SEC14L1  |
| ENSG00000143333 | cluster1 | RGS16    |
| ENSG00000162924 | cluster1 | REL      |
| ENSG00000256206 | cluster1 |          |
| ENSG00000130222 | cluster1 | GADD45G  |
| ENSG00000139946 | cluster1 | PELI2    |
| ENSG00000167553 | cluster1 | TUBA1C   |
| ENSG00000125772 | cluster1 | GPCPD1   |
| ENSG00000170989 | cluster1 | S1PR1    |
| ENSG00000119326 | cluster1 | CTNNAL1  |
| ENSG00000153922 | cluster1 | CHD1     |
| ENSG00000110330 | cluster1 | BIRC2    |
| ENSG00000054967 | cluster1 | RELT     |
| ENSG00000172939 | cluster1 | OXSRI    |
| ENSG00000140332 | cluster1 | TLE3     |
| ENSG00000105329 | cluster1 | TGFB1    |
| ENSG00000109606 | cluster1 | DHX15    |
| ENSG00000060069 | cluster1 | CTDP1    |
| ENSG00000132819 | cluster1 | RBM38    |
| ENSG00000275993 | cluster1 | SIK1B    |

|                 |          |          |
|-----------------|----------|----------|
| ENSG00000153815 | cluster1 | CMIP     |
| ENSG00000099860 | cluster1 | GADD45B  |
| ENSG00000175130 | cluster1 | MARCKSL1 |
| ENSG00000121749 | cluster1 | TBC1D15  |
| ENSG00000267740 | cluster1 |          |
| ENSG00000141551 | cluster1 | CSNK1D   |
| ENSG00000153234 | cluster1 | NR4A2    |
| ENSG00000092820 | cluster1 | EZR      |
| ENSG00000181873 | cluster1 | IBA57    |
| ENSG00000072310 | cluster1 | SREBF1   |
| ENSG00000167996 | cluster1 | FTH1     |
| ENSG00000110713 | cluster1 | NUP98    |
| ENSG00000130844 | cluster1 | ZNF331   |
| ENSG00000130164 | cluster1 | LDLR     |
| ENSG00000173846 | cluster1 | PLK3     |
| ENSG00000141543 | cluster1 | EIF4A3   |
| ENSG00000175197 | cluster1 | DDIT3    |
| ENSG00000144655 | cluster1 | CSRNP1   |
| ENSG00000121671 | cluster1 | CRY2     |
| ENSG00000198026 | cluster1 | ZNF335   |
| ENSG00000122877 | cluster1 | EGR2     |
| ENSG00000166128 | cluster1 | RAB8B    |
| ENSG00000139318 | cluster1 | DUSP6    |
| ENSG00000162298 | cluster1 | SYVN1    |
| ENSG00000188290 | cluster1 | HES4     |
| ENSG00000138074 | cluster1 | SLC5A6   |
| ENSG00000153201 | cluster1 | RANBP2   |
| ENSG00000118985 | cluster1 | ELL2     |
| ENSG00000176105 | cluster1 | YES1     |
| ENSG00000167182 | cluster1 | SP2      |
| ENSG00000198836 | cluster1 | OPA1     |
| ENSG00000143514 | cluster1 | TP53BP2  |
| ENSG00000027697 | cluster1 | IFNGR1   |
| ENSG00000112312 | cluster1 | GMNN     |
| ENSG00000198911 | cluster1 | SREBF2   |
| ENSG00000154124 | cluster1 | OTULIN   |
| ENSG00000101445 | cluster1 | PPP1R16B |
| ENSG00000124762 | cluster1 | CDKN1A   |
| ENSG00000103257 | cluster1 | SLC7A5   |
| ENSG00000100284 | cluster1 | TOM1     |
| ENSG00000073756 | cluster1 | PTGS2    |
| ENSG00000166451 | cluster1 | CENPN    |
| ENSG00000104472 | cluster1 | CHRAC1   |
| ENSG00000084070 | cluster1 | SMAP2    |
| ENSG00000143924 | cluster1 | EML4     |
| ENSG00000117000 | cluster1 | RLF      |
| ENSG00000107372 | cluster1 | ZFAND5   |
| ENSG00000124784 | cluster1 | RIOK1    |
| ENSG00000133872 | cluster1 | SARAF    |
| ENSG00000128016 | cluster1 | ZFP36    |

|                 |          |           |
|-----------------|----------|-----------|
| ENSG00000178209 | cluster1 | PLEC      |
| ENSG00000153989 | cluster1 | NUS1      |
| ENSG00000144580 | cluster1 | CNOT9     |
| ENSG00000134970 | cluster1 | TMED7     |
| ENSG00000099999 | cluster1 | RNF215    |
| ENSG00000120889 | cluster1 | TNFRSF10B |
| ENSG00000164163 | cluster1 | ABCE1     |
| ENSG00000168175 | cluster1 | MAPK1IP1L |
| ENSG00000187231 | cluster1 | SESTD1    |
| ENSG00000167981 | cluster1 | ZNF597    |
| ENSG00000031081 | cluster1 | ARHGAP31  |
| ENSG00000141753 | cluster1 | IGFBP4    |
| ENSG00000151287 | cluster1 | TEX30     |
| ENSG00000155545 | cluster1 | MIER3     |
| ENSG00000104205 | cluster1 | SGK3      |
| ENSG00000213281 | cluster1 | NRAS      |
| ENSG00000034677 | cluster1 | RNF19A    |
| ENSG00000104660 | cluster1 | LEPROTL1  |
| ENSG00000256223 | cluster1 | ZNF10     |
| ENSG00000141448 | cluster1 | GATA6     |
| ENSG00000106948 | cluster1 | AKNA      |
| ENSG00000175040 | cluster1 | CHST2     |
| ENSG00000166887 | cluster1 | VPS39     |
| ENSG00000136159 | cluster1 | NUDT15    |
| ENSG00000107443 | cluster1 | CCNJ      |
| ENSG00000067533 | cluster1 | RRP15     |
| ENSG00000213585 | cluster1 | VDAC1     |
| ENSG00000086189 | cluster1 | DIMT1     |
| ENSG00000156381 | cluster1 | ANKRD9    |
| ENSG00000124406 | cluster1 | ATP8A1    |
| ENSG00000138767 | cluster1 | CNOT6L    |
| ENSG00000178184 | cluster1 | PARD6G    |
| ENSG00000043591 | cluster1 | ADRB1     |
| ENSG00000221968 | cluster1 | FADS3     |
| ENSG00000120063 | cluster1 | GNA13     |
| ENSG00000198060 | cluster1 | MARCHF5   |
| ENSG00000149260 | cluster1 | CAPN5     |
| ENSG00000138018 | cluster1 | SELENOI   |
| ENSG00000080371 | cluster1 | RAB21     |
| ENSG00000112096 | cluster1 | SOD2      |
| ENSG00000170385 | cluster1 | SLC30A1   |
| ENSG00000072274 | cluster1 | TFRC      |
| ENSG00000144749 | cluster1 | LRIG1     |
| ENSG00000154359 | cluster1 | LONRF1    |
| ENSG00000160179 | cluster1 | ABCG1     |
| ENSG00000113448 | cluster1 | PDE4D     |
| ENSG00000127526 | cluster1 | SLC35E1   |
| ENSG00000171522 | cluster1 | PTGER4    |
| ENSG00000196352 | cluster1 | CD55      |
| ENSG00000023902 | cluster1 | PLEKHO1   |

|                 |          |           |
|-----------------|----------|-----------|
| ENSG00000112081 | cluster1 | SRSF3     |
| ENSG00000131015 | cluster1 | ULBP2     |
| ENSG00000137770 | cluster1 | CTDSPL2   |
| ENSG00000123989 | cluster1 | CHPF      |
| ENSG00000147526 | cluster1 | TACC1     |
| ENSG00000137275 | cluster1 | RIPK1     |
| ENSG00000170340 | cluster1 | B3GNT2    |
| ENSG00000171867 | cluster1 | PRNP      |
| ENSG00000100926 | cluster1 | TM9SF1    |
| ENSG00000153066 | cluster1 | TXNDC11   |
| ENSG00000112149 | cluster1 | CD83      |
| ENSG00000118503 | cluster1 | TNFAIP3   |
| ENSG00000112972 | cluster1 | HMGCS1    |
| ENSG00000108106 | cluster1 | UBE2S     |
| ENSG00000069667 | cluster1 | RORA      |
| ENSG00000163743 | cluster1 | RCHY1     |
| ENSG00000111011 | cluster1 | RSRC2     |
| ENSG00000163811 | cluster1 | WDR43     |
| ENSG00000185043 | cluster1 | CIB1      |
| ENSG00000141965 | cluster1 | FEM1A     |
| ENSG00000059804 | cluster1 | SLC2A3    |
| ENSG00000124214 | cluster1 | STAU1     |
| ENSG00000154710 | cluster1 | RABGEF1   |
| ENSG00000103342 | cluster1 | GSPT1     |
| ENSG00000165732 | cluster1 | DDX21     |
| ENSG00000108443 | cluster1 | RPS6KB1   |
| ENSG00000100056 | cluster1 | ESS2      |
| ENSG00000131242 | cluster1 | RAB11FIP4 |
| ENSG00000006712 | cluster1 | PAF1      |
| ENSG00000106346 | cluster1 | USP42     |
| ENSG00000168758 | cluster1 | SEMA4C    |
| ENSG00000118971 | cluster1 | CCND2     |
| ENSG00000137713 | cluster1 | PPP2R1B   |
| ENSG00000163961 | cluster1 | RNF168    |
| ENSG00000171453 | cluster1 | POLR1C    |
| ENSG00000158717 | cluster1 | RNF166    |
| ENSG00000114737 | cluster1 | CISH      |
| ENSG00000055044 | cluster1 | NOP58     |
| ENSG00000019995 | cluster1 | ZRANB1    |
| ENSG00000065135 | cluster1 | GNAI3     |
| ENSG00000113013 | cluster1 | HSPA9     |
| ENSG00000183508 | cluster1 | TENT5C    |
| ENSG00000105656 | cluster1 | ELL       |
| ENSG00000095574 | cluster1 | IKZF5     |
| ENSG00000110448 | cluster1 | CD5       |
| ENSG00000131669 | cluster1 | NINJ1     |
| ENSG00000110906 | cluster1 | KCTD10    |
| ENSG00000095380 | cluster1 | NANS      |
| ENSG00000133316 | cluster1 | WDR74     |
| ENSG00000105643 | cluster1 | ARRDC2    |

|                 |          |         |
|-----------------|----------|---------|
| ENSG00000126561 | cluster1 | STAT5A  |
| ENSG00000108256 | cluster1 | NUFIP2  |
| ENSG00000105671 | cluster1 | DDX49   |
| ENSG00000068724 | cluster1 | TTC7A   |
| ENSG00000099985 | cluster1 | OSM     |
| ENSG00000135926 | cluster1 | TMBIM1  |
| ENSG00000161638 | cluster1 | ITGA5   |
| ENSG00000165733 | cluster1 | BMS1    |
| ENSG00000101654 | cluster1 | RNMT    |
| ENSG00000163938 | cluster1 | GNL3    |
| ENSG00000188229 | cluster1 | TUBB4B  |
| ENSG00000145632 | cluster1 | PLK2    |
| ENSG00000160741 | cluster1 | CRTC2   |
| ENSG00000136108 | cluster1 | CKAP2   |
| ENSG00000204178 | cluster1 | MACO1   |
| ENSG00000117036 | cluster1 | ETV3    |
| ENSG00000107742 | cluster1 | SPOCK2  |
| ENSG00000163719 | cluster1 | MTMR14  |
| ENSG00000161036 | cluster1 | LRWD1   |
| ENSG00000130787 | cluster1 | HIP1R   |
| ENSG00000119725 | cluster1 | ZNF410  |
| ENSG00000117560 | cluster1 | FASLG   |
| ENSG00000123136 | cluster1 | DDX39A  |
| ENSG00000166226 | cluster1 | CCT2    |
| ENSG00000167460 | cluster1 | TPM4    |
| ENSG00000136699 | cluster1 | SMPD4   |
| ENSG00000161204 | cluster1 | ABCF3   |
| ENSG00000113916 | cluster1 | BCL6    |
| ENSG00000146457 | cluster1 | WTAP    |
| ENSG00000239857 | cluster1 | GET4    |
| ENSG00000163874 | cluster1 | ZC3H12A |
| ENSG00000111424 | cluster1 | VDR     |
| ENSG00000112245 | cluster1 | PTP4A1  |
| ENSG00000105127 | cluster1 | AKAP8   |
| ENSG00000150977 | cluster1 | RILPL2  |
| ENSG00000119446 | cluster1 | RBM18   |
| ENSG00000167470 | cluster1 | MIDN    |
| ENSG00000076003 | cluster1 | MCM6    |
| ENSG00000125633 | cluster1 | CCDC93  |
| ENSG00000132376 | cluster1 | INPP5K  |
| ENSG00000257949 | cluster1 | TEN1    |
| ENSG00000198355 | cluster1 | PIM3    |
| ENSG00000135108 | cluster1 | FBXO21  |
| ENSG00000180329 | cluster1 | CCDC43  |
| ENSG00000163904 | cluster1 | SENP2   |
| ENSG00000103978 | cluster1 | TMEM87A |
| ENSG00000089094 | cluster1 | KDM2B   |
| ENSG00000115687 | cluster1 | PASK    |
| ENSG00000153207 | cluster1 | AHCTF1  |
| ENSG00000184557 | cluster1 | SOCS3   |

|                 |          |          |
|-----------------|----------|----------|
| ENSG00000169508 | cluster1 | GPR183   |
| ENSG00000152270 | cluster1 | PDE3B    |
| ENSG00000113580 | cluster1 | NR3C1    |
| ENSG00000164849 | cluster1 | GPR146   |
| ENSG00000167552 | cluster1 | TUBA1A   |
| ENSG00000116106 | cluster1 | EPHA4    |
| ENSG00000160683 | cluster1 | CXCR5    |
| ENSG00000161835 | cluster1 | TAMALIN  |
| ENSG00000111266 | cluster1 | DUSP16   |
| ENSG00000023445 | cluster1 | BIRC3    |
| ENSG00000176531 | cluster1 | PHLDB3   |
| ENSG00000087074 | cluster1 | PPP1R15A |
| ENSG00000139514 | cluster1 | SLC7A1   |
| ENSG00000185905 | cluster1 | C16orf54 |
| ENSG00000116679 | cluster1 | IVNS1ABP |
| ENSG00000143507 | cluster1 | DUSP10   |
| ENSG00000161921 | cluster1 | CXCL16   |
| ENSG00000164951 | cluster1 | PDP1     |
| ENSG00000100425 | cluster1 | BRD1     |
| ENSG00000139289 | cluster1 | PHLDA1   |
| ENSG00000070756 | cluster1 | PABPC1   |
| ENSG00000077238 | cluster1 | IL4R     |
| ENSG00000181222 | cluster1 | POLR2A   |
| ENSG00000109320 | cluster1 | NFKB1    |
| ENSG00000097007 | cluster1 | ABL1     |
| ENSG00000094975 | cluster1 | SUCO     |
| ENSG00000154764 | cluster1 | WNT7A    |
| ENSG00000174738 | cluster1 | NR1D2    |
| ENSG00000123908 | cluster1 | AGO2     |
| ENSG00000198843 | cluster1 | SELENOT  |
| ENSG00000109079 | cluster1 | TNFAIP1  |
| ENSG00000168209 | cluster1 | DDIT4    |
| ENSG00000272886 | cluster1 | DCP1A    |
| ENSG00000090520 | cluster1 | DNAJB11  |
| ENSG00000140968 | cluster1 | IRF8     |
| ENSG00000173960 | cluster1 | UBXN2A   |
| ENSG00000088356 | cluster1 | PDRG1    |
| ENSG00000111371 | cluster1 | SLC38A1  |
| ENSG00000182481 | cluster1 | KPNA2    |
| ENSG00000171617 | cluster1 | ENC1     |
| ENSG00000115539 | cluster1 | PDCL3    |
| ENSG00000100225 | cluster1 | FBXO7    |
| ENSG00000100982 | cluster1 | PCIF1    |
| ENSG00000101247 | cluster1 | NDUFAF5  |
| ENSG00000131408 | cluster1 | NR1H2    |
| ENSG00000176170 | cluster1 | SPHK1    |
| ENSG00000145675 | cluster1 | PIK3R1   |
| ENSG00000144381 | cluster1 | HSPD1    |
| ENSG00000011590 | cluster1 | ZBTB32   |
| ENSG00000135604 | cluster1 | STX11    |



|                 |          |                 |
|-----------------|----------|-----------------|
| ENSG00000175166 | cluster1 | PSMD2           |
| ENSG00000156875 | cluster1 | MFSD14A         |
| ENSG00000055211 | cluster1 | GINM1           |
| ENSG00000132153 | cluster1 | DHX30           |
| ENSG00000136940 | cluster1 | PDCL            |
| ENSG00000160783 | cluster1 | PMF1            |
| ENSG00000160888 | cluster1 | IER2            |
| ENSG00000140740 | cluster1 | UQCRC2          |
| ENSG00000074319 | cluster1 | TSG101          |
| ENSG00000044574 | cluster1 | HSPA5           |
| ENSG00000183520 | cluster1 | UTP11           |
| ENSG00000149100 | cluster1 | EIF3M           |
| ENSG00000184047 | cluster1 | DIABLO          |
| ENSG00000161526 | cluster1 | SAP30BP         |
| ENSG00000123416 | cluster1 | TUBA1B          |
| ENSG00000166579 | cluster1 | NDEL1           |
| ENSG00000157734 | cluster1 | SNX22           |
| ENSG00000100353 | cluster1 | EIF3D           |
| ENSG00000108852 | cluster1 | MPP2            |
| ENSG00000077235 | cluster1 | GTF3C1          |
| ENSG00000070501 | cluster1 | POLB            |
| ENSG00000151726 | cluster1 | ACSL1           |
| ENSG00000028137 | cluster1 | TNFRSF1B        |
| ENSG00000138166 | cluster1 | DUSP5           |
| ENSG00000133794 | cluster1 | ARNTL           |
| ENSG00000164169 | cluster1 | PRMT9           |
| ENSG00000136146 | cluster1 | MED4            |
| ENSG00000169499 | cluster1 | PLEKHA2         |
| ENSG00000100243 | cluster1 | CYB5R3          |
| ENSG00000082153 | cluster1 | BZW1            |
| ENSG00000101082 | cluster1 | SLA2            |
| ENSG00000107643 | cluster1 | MAPK8           |
| ENSG00000189306 | cluster1 | RRP7A           |
| ENSG00000120875 | cluster1 | DUSP4           |
| ENSG00000113811 | cluster1 | SELENOK         |
| ENSG00000148248 | cluster1 | SURF4           |
| ENSG00000134480 | cluster1 | CCNH            |
| ENSG00000109118 | cluster1 | PHF12           |
| ENSG00000139112 | cluster1 | GABARAPL1       |
| ENSG00000078237 | cluster1 | TIGAR           |
| ENSG00000127824 | cluster1 | TUBA4A          |
| ENSG00000173875 | cluster1 | ZNF791          |
| ENSG00000187778 | cluster1 | MCRS1           |
| ENSG00000166289 | cluster1 | PLEKHF1         |
| ENSG00000161939 | cluster1 | RNASEK-C17orf49 |
| ENSG00000139722 | cluster1 | VPS37B          |
| ENSG00000100221 | cluster1 | JOSD1           |
| ENSG00000105568 | cluster1 | PPP2R1A         |
| ENSG00000172977 | cluster1 | KAT5            |
| ENSG00000141030 | cluster1 | COPS3           |

|                 |          |          |
|-----------------|----------|----------|
| ENSG00000145388 | cluster1 | METTL14  |
| ENSG00000125910 | cluster1 | S1PR4    |
| ENSG00000125657 | cluster1 | TNFSF9   |
| ENSG00000132646 | cluster1 | PCNA     |
| ENSG00000170542 | cluster1 | SERPINB9 |
| ENSG00000213523 | cluster1 | SRA1     |
| ENSG00000086666 | cluster1 | ZFAND6   |
| ENSG00000034152 | cluster1 | MAP2K3   |
| ENSG00000108588 | cluster1 | CCDC47   |
| ENSG00000108826 | cluster1 | MRPL27   |
| ENSG00000161547 | cluster1 | SRSF2    |
| ENSG00000125084 | cluster1 | WNT1     |
| ENSG00000197019 | cluster1 | SERTAD1  |
| ENSG00000110172 | cluster1 | CHORDC1  |
| ENSG00000090339 | cluster1 | ICAM1    |
| ENSG00000138678 | cluster1 | GPAT3    |
| ENSG00000175224 | cluster1 | ATG13    |
| ENSG00000105447 | cluster1 | GRWD1    |
| ENSG00000084463 | cluster1 | WBP11    |
| ENSG00000159346 | cluster1 | ADIPOR1  |
| ENSG00000117394 | cluster1 | SLC2A1   |
| ENSG00000242689 | cluster1 | CNTF     |
| ENSG00000119986 | cluster1 | AVPI1    |
| ENSG00000070495 | cluster1 | JMJD6    |
| ENSG00000115649 | cluster1 | CNPPD1   |
| ENSG00000173113 | cluster1 | TRMT112  |
| ENSG00000100949 | cluster1 | RABGGTA  |
| ENSG00000169252 | cluster1 | ADRB2    |
| ENSG00000139832 | cluster1 | RAB20    |
| ENSG00000198218 | cluster1 | QRICH1   |
| ENSG00000173653 | cluster1 | RCE1     |
| ENSG00000066557 | cluster1 | LRRC40   |
| ENSG00000124155 | cluster1 | PIGT     |
| ENSG00000105193 | cluster1 | RPS16    |
| ENSG00000183155 | cluster1 | RABIF    |
| ENSG00000100991 | cluster1 | TRPC4AP  |
| ENSG00000160460 | cluster1 | SPTBN4   |
| ENSG00000230989 | cluster1 | HSBP1    |
| ENSG00000116761 | cluster1 | CTH      |
| ENSG00000099804 | cluster1 | CDC34    |
| ENSG00000163950 | cluster1 | SLBP     |
| ENSG00000101413 | cluster1 | RPRD1B   |
| ENSG00000125538 | cluster1 | IL1B     |
| ENSG00000114686 | cluster1 | MRPL3    |
| ENSG00000105993 | cluster1 | DNAJB6   |
| ENSG00000140157 | cluster1 | NIPA2    |
| ENSG00000242114 | cluster1 | MTFP1    |
| ENSG00000154719 | cluster1 | MRPL39   |
| ENSG00000169972 | cluster1 | PUSL1    |
| ENSG00000091140 | cluster1 | DLD      |

|                 |          |         |
|-----------------|----------|---------|
| ENSG00000186480 | cluster1 | INSIG1  |
| ENSG00000198369 | cluster1 | SPRED2  |
| ENSG00000174574 | cluster1 | AKIRIN1 |
| ENSG00000197170 | cluster1 | PSMD12  |
| ENSG00000143183 | cluster1 | TMCO1   |
| ENSG00000196526 | cluster1 | AFAP1   |
| ENSG00000143793 | cluster1 | C1orf35 |
| ENSG00000086062 | cluster1 | B4GALT1 |
| ENSG00000115339 | cluster1 | GALNT3  |
| ENSG00000105851 | cluster1 | PIK3CG  |
| ENSG00000124198 | cluster1 | ARFGEF2 |
| ENSG00000130734 | cluster1 | ATG4D   |
| ENSG00000172331 | cluster1 | BPGM    |
| ENSG00000152193 | cluster1 | OBI1    |
| ENSG00000167550 | cluster1 | RHEBL1  |
| ENSG00000085840 | cluster1 | ORC1    |
| ENSG00000096080 | cluster1 | MRPS18A |
| ENSG00000100290 | cluster1 | BIK     |
| ENSG00000115548 | cluster1 | KDM3A   |
| ENSG00000100461 | cluster1 | RBM23   |
| ENSG00000171813 | cluster1 | PWWP2B  |
| ENSG00000180479 | cluster1 | ZNF571  |
| ENSG00000178726 | cluster1 | THBD    |
| ENSG00000149177 | cluster1 | PTPRJ   |
| ENSG00000139725 | cluster1 | RHOF    |
| ENSG00000178821 | cluster1 | TMEM52  |
| ENSG00000100266 | cluster1 | PACSIN2 |
| ENSG00000137265 | cluster1 | IRF4    |
| ENSG00000176845 | cluster1 | METRNL  |
| ENSG00000213413 | cluster1 | PVRIG   |
| ENSG00000182173 | cluster1 | TSEN54  |
| ENSG00000186575 | cluster1 | NF2     |
| ENSG00000094804 | cluster1 | CDC6    |
| ENSG00000157693 | cluster1 | TMEM268 |
| ENSG00000006025 | cluster1 | OSBPL7  |
| ENSG00000162191 | cluster1 | UBXN1   |
| ENSG00000117399 | cluster1 | CDC20   |
| ENSG00000172893 | cluster1 | DHCR7   |
| ENSG00000144647 | cluster1 | POMGNT2 |
| ENSG00000109270 | cluster1 | LAMTOR3 |
| ENSG00000109321 | cluster1 | AREG    |
| ENSG00000139372 | cluster1 | TDG     |
| ENSG00000284512 | cluster1 |         |
| ENSG00000182149 | cluster1 | IST1    |
| ENSG00000196072 | cluster1 | BLOC1S2 |
| ENSG00000002549 | cluster1 | LAP3    |
| ENSG00000104765 | cluster1 | BNIP3L  |
| ENSG00000064726 | cluster1 | BTBD1   |
| ENSG00000144597 | cluster1 | EAF1    |
| ENSG00000128708 | cluster1 | HAT1    |

|                 |          |          |
|-----------------|----------|----------|
| ENSG00000131747 | cluster1 | TOP2A    |
| ENSG00000284946 | cluster1 |          |
| ENSG00000114013 | cluster1 | CD86     |
| ENSG00000197629 | cluster1 | MPEG1    |
| ENSG00000205323 | cluster1 | SARNP    |
| ENSG00000081041 | cluster1 | CXCL2    |
| ENSG00000165046 | cluster1 | LETM2    |
| ENSG00000018280 | cluster1 | SLC11A1  |
| ENSG00000187522 | cluster1 | HSPA14   |
| ENSG00000124731 | cluster1 | TREM1    |
| ENSG00000175606 | cluster1 | TMEM70   |
| ENSG00000119414 | cluster1 | PPP6C    |
| ENSG00000138757 | cluster1 | G3BP2    |
| ENSG00000083937 | cluster1 | CHMP2B   |
| ENSG00000123689 | cluster1 | GOS2     |
| ENSG00000006007 | cluster1 | GDE1     |
| ENSG00000198604 | cluster1 | BAZ1A    |
| ENSG00000114416 | cluster1 | FXR1     |
| ENSG00000119801 | cluster1 | YPEL5    |
| ENSG00000152484 | cluster1 | USP12    |
| ENSG00000153786 | cluster1 | ZDHHC7   |
| ENSG00000155096 | cluster1 | AZIN1    |
| ENSG00000134758 | cluster1 | RNF138   |
| ENSG00000132155 | cluster1 | RAF1     |
| ENSG00000150787 | cluster1 | PTS      |
| ENSG00000135070 | cluster1 | ISCA1    |
| ENSG00000137409 | cluster1 | MTCH1    |
| ENSG00000123146 | cluster1 | ADGRE5   |
| ENSG00000162650 | cluster1 | ATXN7L2  |
| ENSG00000185022 | cluster1 | MAFF     |
| ENSG00000177105 | cluster1 | RHOG     |
| ENSG00000173848 | cluster1 | NET1     |
| ENSG00000104671 | cluster1 | DCTN6    |
| ENSG00000120705 | cluster1 | ETF1     |
| ENSG00000118707 | cluster1 | TGIF2    |
| ENSG00000134333 | cluster1 | LDHA     |
| ENSG00000132326 | cluster1 | PER2     |
| ENSG00000137575 | cluster1 | SDCBP    |
| ENSG00000150593 | cluster1 | PDCD4    |
| ENSG00000101166 | cluster1 | PRELID3B |
| ENSG00000108406 | cluster1 | DHX40    |
| ENSG00000023734 | cluster1 | STRAP    |
| ENSG00000119682 | cluster1 | AREL1    |
| ENSG00000113384 | cluster1 | GOLPH3   |
| ENSG00000177169 | cluster1 | ULK1     |
| ENSG00000180008 | cluster1 | SOCS4    |
| ENSG00000153561 | cluster1 | RMND5A   |
| ENSG00000181826 | cluster1 | RELL1    |
| ENSG00000107566 | cluster1 | ERLIN1   |
| ENSG00000175110 | cluster1 | MRPS22   |

|                 |          |          |
|-----------------|----------|----------|
| ENSG00000048162 | cluster1 | NOP16    |
| ENSG00000213638 | cluster1 | ADAT3    |
| ENSG00000140941 | cluster1 | MAP1LC3B |
| ENSG00000131100 | cluster1 | ATP6V1E1 |
| ENSG00000255112 | cluster1 | CHMP1B   |
| ENSG00000213906 | cluster1 | LTB4R2   |
| ENSG00000068697 | cluster1 | LAPTM4A  |
| ENSG00000124209 | cluster1 | RAB22A   |
| ENSG00000134108 | cluster1 | ARL8B    |
| ENSG00000106615 | cluster1 | RHEB     |
| ENSG00000178974 | cluster1 | FBXO34   |
| ENSG00000187840 | cluster1 | EIF4EBP1 |
| ENSG00000100138 | cluster1 | SNU13    |
| ENSG00000122958 | cluster1 | VPS26A   |
| ENSG00000176142 | cluster1 | TMEM39A  |
| ENSG00000136754 | cluster1 | ABI1     |
| ENSG00000131115 | cluster1 | ZNF227   |
| ENSG00000113161 | cluster1 | HMGCR    |
| ENSG00000186350 | cluster1 | RXRA     |
| ENSG00000128989 | cluster1 | ARPP19   |
| ENSG00000008282 | cluster1 | SYPL1    |
| ENSG00000150768 | cluster1 | DLAT     |
| ENSG00000111596 | cluster1 | CNOT2    |
| ENSG00000115875 | cluster1 | SRSF7    |
| ENSG00000075415 | cluster1 | SLC25A3  |
| ENSG00000135048 | cluster1 | CEMIP2   |
| ENSG00000096654 | cluster1 | ZNF184   |
| ENSG00000136986 | cluster1 | DERL1    |
| ENSG00000101460 | cluster1 | MAP1LC3A |
| ENSG00000156502 | cluster1 | SUPV3L1  |
| ENSG00000090104 | cluster1 | RGS1     |
| ENSG00000155329 | cluster1 | ZCCHC10  |
| ENSG00000065154 | cluster1 | OAT      |
| ENSG00000103121 | cluster1 | CMC2     |
| ENSG00000122862 | cluster1 | SRGN     |
| ENSG00000164944 | cluster1 | VIRMA    |
| ENSG00000165802 | cluster1 | NSMF     |
| ENSG00000076356 | cluster1 | PLXNA2   |
| ENSG00000244165 | cluster1 | P2RY11   |
| ENSG00000119048 | cluster1 | UBE2B    |
| ENSG00000164168 | cluster1 | TMEM184C |
| ENSG00000085872 | cluster1 | CHERP    |
| ENSG00000189319 | cluster1 | FAM53B   |
| ENSG00000121481 | cluster1 | RNF2     |
| ENSG00000134265 | cluster1 | NAPG     |
| ENSG00000146963 | cluster1 | LUC7L2   |
| ENSG00000162511 | cluster1 | LAPTM5   |
| ENSG00000123091 | cluster1 | RNF11    |
| ENSG00000185883 | cluster1 | ATP6V0C  |
| ENSG00000177666 | cluster1 | PNPLA2   |

|                 |          |          |
|-----------------|----------|----------|
| ENSG00000163464 | cluster1 | CXCR1    |
| ENSG00000145495 | cluster1 | MARCHF6  |
| ENSG00000188486 | cluster1 | H2AX     |
| ENSG00000198780 | cluster1 | FAM169A  |
| ENSG00000274286 | cluster1 | ADRA2B   |
| ENSG00000211455 | cluster1 | STK38L   |
| ENSG00000173039 | cluster1 | RELA     |
| ENSG00000138050 | cluster1 | THUMPD2  |
| ENSG00000008405 | cluster1 | CRY1     |
| ENSG00000104856 | cluster1 | RELB     |
| ENSG00000100003 | cluster1 | SEC14L2  |
| ENSG00000015153 | cluster1 | YAF2     |
| ENSG00000059758 | cluster1 | CDK17    |
| ENSG00000076067 | cluster1 | RBMS2    |
| ENSG00000109917 | cluster1 | ZPR1     |
| ENSG00000148841 | cluster1 | ITPRIP   |
| ENSG00000158321 | cluster1 | AUTS2    |
| ENSG00000100916 | cluster1 | BRMS1L   |
| ENSG00000104824 | cluster1 | HNRNPL   |
| ENSG00000105323 | cluster1 | HNRNPUL1 |
| ENSG00000204525 | cluster1 | HLA-C    |
| ENSG00000047315 | cluster1 | POLR2B   |
| ENSG00000158792 | cluster1 | SPATA2L  |
| ENSG00000136603 | cluster1 | SKIL     |
| ENSG00000038358 | cluster1 | EDC4     |
| ENSG00000036257 | cluster1 | CUL3     |
| ENSG00000167508 | cluster1 | MVD      |
| ENSG00000101452 | cluster1 | DHX35    |
| ENSG00000182687 | cluster1 | GALR2    |
| ENSG00000110514 | cluster1 | MADD     |
| ENSG00000121579 | cluster1 | NAA50    |
| ENSG00000188338 | cluster1 | SLC38A3  |
| ENSG00000126003 | cluster1 | PLAGL2   |
| ENSG00000123933 | cluster1 | MXD4     |
| ENSG00000011422 | cluster1 | PLAUR    |
| ENSG00000160218 | cluster1 | TRAPPC10 |
| ENSG00000196843 | cluster1 | ARID5A   |
| ENSG00000176853 | cluster1 | FAM91A1  |
| ENSG00000155926 | cluster1 | SLA      |
| ENSG00000105339 | cluster1 | DENND3   |
| ENSG00000001630 | cluster1 | CYP51A1  |
| ENSG00000125735 | cluster1 | TNFSF14  |
| ENSG00000132334 | cluster1 | PTPRE    |
| ENSG00000148331 | cluster1 | ASB6     |
| ENSG00000085978 | cluster1 | ATG16L1  |
| ENSG00000137801 | cluster1 | THBS1    |
| ENSG00000087087 | cluster1 | SRRT     |
| ENSG00000184588 | cluster1 | PDE4B    |
| ENSG00000161011 | cluster1 | SQSTM1   |
| ENSG00000100226 | cluster1 | GTPBP1   |

|                 |          |              |
|-----------------|----------|--------------|
| ENSG00000103522 | cluster1 | IL21R        |
| ENSG00000122490 | cluster1 | SLC66A2      |
| ENSG00000139636 | cluster1 | LMBR1L       |
| ENSG00000095794 | cluster1 | CREM         |
| ENSG00000171793 | cluster1 | CTPS1        |
| ENSG00000174177 | cluster1 | CTU2         |
| ENSG00000138750 | cluster1 | NUP54        |
| ENSG00000100614 | cluster1 | PPM1A        |
| ENSG00000101310 | cluster1 | SEC23B       |
| ENSG00000103365 | cluster1 | GGA2         |
| ENSG00000241484 | cluster1 | ARHGAP8      |
| ENSG00000125651 | cluster1 | GTF2F1       |
| ENSG00000116044 | cluster1 | NFE2L2       |
| ENSG00000107937 | cluster1 | GTPBP4       |
| ENSG00000134107 | cluster1 | BHLHE40      |
| ENSG00000085433 | cluster1 | WDR47        |
| ENSG00000100401 | cluster1 | RANGAP1      |
| ENSG00000132002 | cluster1 | DNAJB1       |
| ENSG00000116741 | cluster1 | RGS2         |
| ENSG00000151327 | cluster1 | FAM177A1     |
| ENSG00000105402 | cluster1 | NAPA         |
| ENSG00000116717 | cluster1 | GADD45A      |
| ENSG00000165714 | cluster1 | BORCS5       |
| ENSG00000075426 | cluster1 | FOSL2        |
| ENSG00000123358 | cluster1 | NR4A1        |
| ENSG00000155307 | cluster1 | SAMSN1       |
| ENSG00000162711 | cluster1 | NLRP3        |
| ENSG00000160932 | cluster1 | LY6E         |
| ENSG00000068878 | cluster1 | PSME4        |
| ENSG00000069399 | cluster1 | BCL3         |
| ENSG00000111897 | cluster1 | SERINC1      |
| ENSG00000137656 | cluster1 | BUD13        |
| ENSG00000035687 | cluster1 | ADSS2        |
| ENSG00000119950 | cluster1 | MXI1         |
| ENSG00000105085 | cluster1 | MED26        |
| ENSG00000089902 | cluster1 | RCOR1        |
| ENSG00000063978 | cluster1 | RNF4         |
| ENSG00000089159 | cluster1 | PXN          |
| ENSG00000141522 | cluster1 | ARHGDIA      |
| ENSG00000182318 | cluster1 | ZSCAN22      |
| ENSG00000196428 | cluster1 | TSC22D2      |
| ENSG00000158545 | cluster1 | ZC3H18       |
| ENSG00000007168 | cluster1 | PAFAH1B1     |
| ENSG00000248405 | cluster1 | PRR5-ARHGAP8 |
| ENSG00000145569 | cluster1 | OTULINL      |
| ENSG00000101361 | cluster1 | NOP56        |
| ENSG00000184922 | cluster1 | FMNL1        |
| ENSG00000198380 | cluster1 | GFPT1        |
| ENSG00000129083 | cluster1 | COPB1        |
| ENSG00000248751 | cluster1 |              |

|                 |          |          |
|-----------------|----------|----------|
| ENSG00000182827 | cluster1 | ACBD3    |
| ENSG00000111737 | cluster1 | RAB35    |
| ENSG00000138821 | cluster1 | SLC39A8  |
| ENSG00000178860 | cluster1 | MSC      |
| ENSG00000116016 | cluster1 | EPAS1    |
| ENSG00000155252 | cluster1 | PI4K2A   |
| ENSG00000153391 | cluster1 | INO80C   |
| ENSG00000103274 | cluster1 | NUBP1    |
| ENSG00000005007 | cluster1 | UPF1     |
| ENSG00000115816 | cluster1 | CEBPZ    |
| ENSG00000095261 | cluster1 | PSMD5    |
| ENSG00000176095 | cluster1 | IP6K1    |
| ENSG00000099797 | cluster1 | TECR     |
| ENSG00000165006 | cluster1 | UBAP1    |
| ENSG00000020633 | cluster1 | RUNX3    |
| ENSG00000131446 | cluster1 | MGAT1    |
| ENSG00000100109 | cluster1 | TFIP11   |
| ENSG00000100580 | cluster1 | TMED8    |
| ENSG00000196814 | cluster1 | MVB12B   |
| ENSG00000072121 | cluster1 | ZFYVE26  |
| ENSG00000164338 | cluster1 | UTP15    |
| ENSG00000172345 | cluster1 | STARD5   |
| ENSG00000152223 | cluster1 | EPG5     |
| ENSG00000180901 | cluster1 | KCTD2    |
| ENSG00000118965 | cluster1 | WDR35    |
| ENSG00000163900 | cluster1 | TMEM41A  |
| ENSG00000174652 | cluster1 | ZNF266   |
| ENSG00000135821 | cluster1 | GLUL     |
| ENSG00000109943 | cluster1 | CRTAM    |
| ENSG00000100292 | cluster1 | HMOX1    |
| ENSG00000161955 | cluster1 | TNFSF13  |
| ENSG00000255274 | cluster1 | SMIM35   |
| ENSG00000082515 | cluster1 | MRPL22   |
| ENSG00000142444 | cluster1 | TIMM29   |
| ENSG00000186364 | cluster1 | NUDT17   |
| ENSG00000114354 | cluster1 | TFG      |
| ENSG00000147669 | cluster1 | POLR2K   |
| ENSG00000184792 | cluster1 | OSBP2    |
| ENSG00000122203 | cluster1 | KIAA1191 |
| ENSG00000172216 | cluster1 | CEBPB    |
| ENSG00000124641 | cluster1 | MED20    |
| ENSG00000172031 | cluster1 | EPHX4    |
| ENSG00000030582 | cluster1 | GRN      |
| ENSG00000135632 | cluster1 | SMYD5    |
| ENSG00000070413 | cluster1 | DGCR2    |
| ENSG00000159720 | cluster1 | ATP6V0D1 |
| ENSG00000114742 | cluster1 | WDR48    |
| ENSG00000213639 | cluster1 | PPP1CB   |
| ENSG00000122705 | cluster1 | CLTA     |
| ENSG00000181467 | cluster1 | RAP2B    |



|                 |          |         |
|-----------------|----------|---------|
| ENSG00000171566 | cluster1 | PLRG1   |
| ENSG00000138434 | cluster1 | ITPRID2 |
| ENSG00000164162 | cluster1 | ANAPC10 |
| ENSG00000100036 | cluster1 | SLC35E4 |
| ENSG00000188725 | cluster1 | SMIM15  |
| ENSG00000260916 | cluster1 | CCPG1   |
| ENSG00000136867 | cluster1 | SLC31A2 |
| ENSG00000125870 | cluster1 | SNRPB2  |
| ENSG00000145354 | cluster1 | CISD2   |
| ENSG00000173334 | cluster1 | TRIB1   |
| ENSG00000198612 | cluster1 | COPS8   |
| ENSG00000163788 | cluster1 | SNRK    |
| ENSG00000175354 | cluster1 | PTPN2   |
| ENSG00000108061 | cluster1 | SHOC2   |
| ENSG00000144136 | cluster1 | SLC20A1 |
| ENSG00000162642 | cluster1 | C1orf52 |
| ENSG00000143294 | cluster1 | PRCC    |
| ENSG00000170852 | cluster1 | KBTBD2  |
| ENSG00000125304 | cluster1 | TM9SF2  |
| ENSG00000123975 | cluster1 | CKS2    |
| ENSG00000068912 | cluster1 | ERLEC1  |
| ENSG00000189067 | cluster1 | LITAF   |
| ENSG00000172115 | cluster1 | CYCS    |
| ENSG00000041802 | cluster1 | LSG1    |
| ENSG00000163214 | cluster1 | DHX57   |
| ENSG00000165458 | cluster1 | INPPL1  |
| ENSG00000176597 | cluster1 | B3GNT5  |
| ENSG00000104853 | cluster1 | CLPTM1  |
| ENSG00000166012 | cluster1 | TAF1D   |
| ENSG00000120685 | cluster1 | PROSER1 |
| ENSG00000008952 | cluster1 | SEC62   |
| ENSG00000116852 | cluster1 | KIF21B  |
| ENSG00000164751 | cluster1 | PEX2    |
| ENSG00000145780 | cluster1 | FEM1C   |
| ENSG00000138433 | cluster1 | CIR1    |
| ENSG00000130479 | cluster1 | MAP1S   |
| ENSG00000197933 | cluster1 | ZNF823  |
| ENSG00000198522 | cluster1 | GPN1    |
| ENSG00000157224 | cluster1 | CLDN12  |
| ENSG00000164674 | cluster1 | SYTL3   |
| ENSG00000169955 | cluster1 | ZNF747  |
| ENSG00000179218 | cluster1 | CALR    |
| ENSG00000121274 | cluster1 | TENT4B  |
| ENSG00000134809 | cluster1 | TIMM10  |
| ENSG00000185436 | cluster1 | IFNLR1  |
| ENSG00000095397 | cluster1 | WHRN    |
| ENSG00000118496 | cluster1 | FBXO30  |
| ENSG00000163913 | cluster1 | IFT122  |
| ENSG00000057704 | cluster1 | TMCC3   |
| ENSG00000182095 | cluster1 | TNRC18  |

|                 |          |             |
|-----------------|----------|-------------|
| ENSG00000130766 | cluster1 | SESN2       |
| ENSG00000065989 | cluster1 | PDE4A       |
| ENSG00000169554 | cluster1 | ZEB2        |
| ENSG00000160949 | cluster1 | TONSL       |
| ENSG00000196730 | cluster1 | DAPK1       |
| ENSG00000101400 | cluster1 | SNTA1       |
| ENSG00000196466 | cluster1 | ZNF799      |
| ENSG00000100321 | cluster1 | SYNGR1      |
| ENSG00000021762 | cluster1 | OSBPL5      |
| ENSG00000180739 | cluster1 | S1PR5       |
| ENSG00000171970 | cluster1 | ZNF57       |
| ENSG00000288534 | cluster1 |             |
| ENSG00000255639 | cluster1 |             |
| ENSG00000136869 | cluster1 | TLR4        |
| ENSG00000090382 | cluster1 | LYZ         |
| ENSG00000102870 | cluster1 | ZNF629      |
| ENSG00000135114 | cluster1 | OASL        |
| ENSG00000119917 | cluster1 | IFIT3       |
| ENSG00000167565 | cluster1 | SERTAD3     |
| ENSG00000136870 | cluster1 | ZNF189      |
| ENSG00000275464 | cluster1 |             |
| ENSG00000173262 | cluster1 | SLC2A14     |
| ENSG00000100453 | cluster1 | GZMB        |
| ENSG00000161911 | cluster1 | TREML1      |
| ENSG00000259207 | cluster1 | ITGB3       |
| ENSG00000124422 | cluster1 | USP22       |
| ENSG00000054793 | cluster1 | ATP9A       |
| ENSG00000197619 | cluster1 | ZNF615      |
| ENSG00000135631 | cluster1 | RAB11FIP5   |
| ENSG00000143373 | cluster1 | ZNF687      |
| ENSG00000081014 | cluster1 | AP4E1       |
| ENSG00000254087 | cluster1 | LYN         |
| ENSG00000168566 | cluster1 | SNRNP48     |
| ENSG00000161671 | cluster1 | EMC10       |
| ENSG00000064703 | cluster1 | DDX20       |
| ENSG00000090013 | cluster1 | BLVRB       |
| ENSG00000254806 | cluster1 | SYS1-DBNDD2 |
| ENSG00000115541 | cluster1 | HSPE1       |
| ENSG00000099203 | cluster1 | TMED1       |
| ENSG00000177963 | cluster1 | RIC8A       |
| ENSG00000133119 | cluster1 | RFC3        |
| ENSG00000167604 | cluster1 | NFKBID      |
| ENSG00000128383 | cluster1 | APOBEC3A    |
| ENSG00000107968 | cluster1 | MAP3K8      |
| ENSG00000216490 | cluster1 | IFI30       |
| ENSG00000171241 | cluster1 | SHCBP1      |
| ENSG00000163220 | cluster1 | S100A9      |
| ENSG00000170458 | cluster1 | CD14        |
| ENSG00000257315 | cluster1 | ZBED6       |
| ENSG00000234745 | cluster1 | HLA-B       |

|                 |          |         |
|-----------------|----------|---------|
| ENSG00000188404 | cluster2 | SELL    |
| ENSG00000144290 | cluster2 | SLC4A10 |
| ENSG00000163947 | cluster2 | ARHGEF3 |
| ENSG00000099968 | cluster2 | BCL2L13 |
| ENSG00000172348 | cluster2 | RCAN2   |
| ENSG00000158411 | cluster2 | MITD1   |
| ENSG00000072042 | cluster2 | RDH11   |
| ENSG00000106479 | cluster2 | ZNF862  |
| ENSG00000100034 | cluster2 | PPM1F   |
| ENSG00000066294 | cluster2 | CD84    |
| ENSG00000162654 | cluster2 | GBP4    |
| ENSG00000139193 | cluster2 | CD27    |
| ENSG00000146425 | cluster2 | DYNLT1  |
| ENSG00000058668 | cluster2 | ATP2B4  |
| ENSG00000146285 | cluster2 | SCML4   |
| ENSG00000133574 | cluster2 | GIMAP4  |
| ENSG00000065413 | cluster2 | ANKRD44 |
| ENSG00000169740 | cluster2 | ZNF32   |
| ENSG00000101574 | cluster2 | METTL4  |
| ENSG00000181847 | cluster2 | TIGIT   |
| ENSG00000161405 | cluster2 | IKZF3   |
| ENSG00000133706 | cluster2 | LARS1   |
| ENSG00000069329 | cluster2 | VPS35   |
| ENSG00000070269 | cluster2 | TMEM260 |
| ENSG00000089012 | cluster2 | SIRPG   |
| ENSG00000007312 | cluster2 | CD79B   |
| ENSG00000183718 | cluster2 | TRIM52  |
| ENSG00000013392 | cluster2 | RWDD2A  |
| ENSG00000138496 | cluster2 | PARP9   |
| ENSG00000165730 | cluster2 | STOX1   |
| ENSG00000082212 | cluster2 | ME2     |
| ENSG00000243646 | cluster2 | IL10RB  |
| ENSG00000106991 | cluster2 | ENG     |
| ENSG00000074966 | cluster2 | TXK     |
| ENSG00000181215 | cluster2 | C4orf50 |
| ENSG00000054219 | cluster2 | LY75    |
| ENSG00000120913 | cluster2 | PDLIM2  |
| ENSG00000171163 | cluster2 | ZNF692  |
| ENSG00000167700 | cluster2 | MFSD3   |
| ENSG00000134452 | cluster2 | FBH1    |
| ENSG00000162777 | cluster2 | DENND2D |
| ENSG00000151702 | cluster2 | FLI1    |
| ENSG00000083454 | cluster2 | P2RX5   |
| ENSG00000196510 | cluster2 | ANAPC7  |
| ENSG00000205758 | cluster2 | CRYZL1  |
| ENSG00000149016 | cluster2 | TUT1    |
| ENSG00000111801 | cluster2 | BTN3A3  |
| ENSG00000111913 | cluster2 | RIPOR2  |
| ENSG00000120526 | cluster2 | NUDCD1  |
| ENSG00000037757 | cluster2 | MRI1    |

|                 |          |           |
|-----------------|----------|-----------|
| ENSG00000178802 | cluster2 | MPI       |
| ENSG00000213918 | cluster2 | DNASE1    |
| ENSG00000108848 | cluster2 | LUC7L3    |
| ENSG00000116455 | cluster2 | WDR77     |
| ENSG00000171130 | cluster2 | ATP6V0E2  |
| ENSG00000157978 | cluster2 | LDLRAP1   |
| ENSG00000157916 | cluster2 | RER1      |
| ENSG00000110031 | cluster2 | LPXN      |
| ENSG00000135736 | cluster2 | CCDC102A  |
| ENSG00000137752 | cluster2 | CASP1     |
| ENSG00000177156 | cluster2 | TALDO1    |
| ENSG00000134897 | cluster2 | BIVM      |
| ENSG00000163568 | cluster2 | AIM2      |
| ENSG00000092964 | cluster2 | DPYSL2    |
| ENSG00000101347 | cluster2 | SAMHD1    |
| ENSG00000198771 | cluster2 | RCSD1     |
| ENSG00000215883 | cluster2 | CYB5RL    |
| ENSG00000132530 | cluster2 | XAF1      |
| ENSG00000138617 | cluster2 | PARP16    |
| ENSG00000124588 | cluster2 | NQO2      |
| ENSG00000204611 | cluster2 | ZNF616    |
| ENSG00000082074 | cluster2 | FYB1      |
| ENSG00000176422 | cluster2 | SPRYD4    |
| ENSG00000174456 | cluster2 | C12orf76  |
| ENSG00000104689 | cluster2 | TNFRSF10A |
| ENSG00000135272 | cluster2 | MDFIC     |
| ENSG00000106785 | cluster2 | TRIM14    |
| ENSG00000275074 | cluster2 | NUDT18    |
| ENSG00000177054 | cluster2 | ZDHHC13   |
| ENSG00000205643 | cluster2 | CDPF1     |
| ENSG00000146918 | cluster2 | NCAPG2    |
| ENSG00000112304 | cluster2 | ACOT13    |
| ENSG00000102871 | cluster2 | TRADD     |
| ENSG00000134765 | cluster2 | DSC1      |
| ENSG00000133678 | cluster2 | TMEM254   |
| ENSG00000196187 | cluster2 | TMEM63A   |
| ENSG00000185252 | cluster2 | ZNF74     |
| ENSG00000131370 | cluster2 | SH3BP5    |
| ENSG00000124222 | cluster2 | STX16     |
| ENSG00000174989 | cluster2 | FBXW8     |
| ENSG00000140993 | cluster2 | TIGD7     |
| ENSG00000152778 | cluster2 | IFIT5     |
| ENSG00000139998 | cluster2 | RAB15     |
| ENSG00000181192 | cluster2 | DHTKD1    |
| ENSG00000132801 | cluster2 | ZSWIM3    |
| ENSG00000170209 | cluster2 | ANKK1     |
| ENSG00000119397 | cluster2 | CNTRL     |
| ENSG00000196670 | cluster2 | ZFP62     |
| ENSG00000172269 | cluster2 | DPAGT1    |
| ENSG00000166135 | cluster2 | HIF1AN    |

|                 |          |          |
|-----------------|----------|----------|
| ENSG00000135828 | cluster2 | RNASEL   |
| ENSG00000140553 | cluster2 | UNC45A   |
| ENSG00000067057 | cluster2 | PFKP     |
| ENSG00000151065 | cluster2 | DCP1B    |
| ENSG00000009790 | cluster2 | TRAF3IP3 |
| ENSG00000167220 | cluster2 | HDHD2    |
| ENSG00000171148 | cluster2 | TADA3    |
| ENSG00000133835 | cluster2 | HSD17B4  |
| ENSG00000136485 | cluster2 | DCAF7    |
| ENSG00000095059 | cluster2 | DHPS     |
| ENSG00000119471 | cluster2 | HSDL2    |
| ENSG00000116198 | cluster2 | CEP104   |
| ENSG00000159445 | cluster2 | THEM4    |
| ENSG00000166272 | cluster2 | WBP1L    |
| ENSG00000173208 | cluster2 | ABCD2    |
| ENSG00000132256 | cluster2 | TRIM5    |
| ENSG00000138375 | cluster2 | SMARCAL1 |
| ENSG00000198130 | cluster2 | HIBCH    |
| ENSG00000181562 | cluster2 | EDDM3A   |
| ENSG00000162144 | cluster2 | CYB561A3 |
| ENSG00000088888 | cluster2 | MAVS     |
| ENSG00000166436 | cluster2 | TRIM66   |
| ENSG00000169131 | cluster2 | ZNF354A  |
| ENSG00000029639 | cluster2 | TFB1M    |
| ENSG00000114026 | cluster2 | OGG1     |
| ENSG00000100304 | cluster2 | TTLL12   |
| ENSG00000174292 | cluster2 | TNK1     |
| ENSG00000122741 | cluster2 | DCAF10   |
| ENSG00000184465 | cluster2 | WDR27    |
| ENSG00000174516 | cluster2 | PELI3    |
| ENSG00000164530 | cluster2 | PI16     |
| ENSG00000148843 | cluster2 | PDCD11   |
| ENSG00000177200 | cluster2 | CHD9     |
| ENSG00000185942 | cluster2 | NKAIN3   |
| ENSG00000103051 | cluster2 | COG4     |
| ENSG00000143970 | cluster2 | ASXL2    |
| ENSG00000018699 | cluster2 | TTC27    |
| ENSG00000106261 | cluster2 | ZKSCAN1  |
| ENSG00000108469 | cluster2 | RECQL5   |
| ENSG00000143811 | cluster2 | PYCR2    |
| ENSG00000243811 | cluster2 | APOBEC3D |
| ENSG00000178096 | cluster2 | BOLA1    |
| ENSG00000109814 | cluster2 | UGDH     |
| ENSG00000114770 | cluster2 | ABCC5    |
| ENSG00000165698 | cluster2 | SPACA9   |
| ENSG00000163516 | cluster2 | ANKZF1   |
| ENSG00000121621 | cluster2 | KIF18A   |
| ENSG00000163157 | cluster2 | TMOD4    |
| ENSG00000146802 | cluster2 | TMEM168  |
| ENSG00000126091 | cluster2 | ST3GAL3  |

|                 |          |          |
|-----------------|----------|----------|
| ENSG00000163472 | cluster2 | TMEM79   |
| ENSG00000185220 | cluster2 | PGBD2    |
| ENSG00000142330 | cluster2 | CAPN10   |
| ENSG00000145348 | cluster2 | TBCK     |
| ENSG00000099810 | cluster2 | MTAP     |
| ENSG00000119711 | cluster2 | ALDH6A1  |
| ENSG00000011143 | cluster2 | MKS1     |
| ENSG00000184574 | cluster2 | LPAR5    |
| ENSG00000112118 | cluster2 | MCM3     |
| ENSG00000213380 | cluster2 | COG8     |
| ENSG00000101751 | cluster2 | POLI     |
| ENSG00000003400 | cluster2 | CASP10   |
| ENSG00000161010 | cluster2 | MRNIP    |
| ENSG00000100201 | cluster2 | DDX17    |
| ENSG00000143801 | cluster2 | PSEN2    |
| ENSG00000104518 | cluster2 | GSDMD    |
| ENSG00000114999 | cluster2 | TTL      |
| ENSG00000196458 | cluster2 | ZNF605   |
| ENSG00000257390 | cluster2 |          |
| ENSG00000157870 | cluster2 | PRXL2B   |
| ENSG00000175782 | cluster2 | SLC35E3  |
| ENSG00000135315 | cluster2 | CEP162   |
| ENSG00000136636 | cluster2 | KCTD3    |
| ENSG00000111732 | cluster2 | AICDA    |
| ENSG00000126070 | cluster2 | AGO3     |
| ENSG00000198740 | cluster2 | ZNF652   |
| ENSG00000189195 | cluster2 | BTBD8    |
| ENSG00000163703 | cluster2 | CRELD1   |
| ENSG00000180357 | cluster2 | ZNF609   |
| ENSG00000141219 | cluster2 | C17orf80 |
| ENSG00000166257 | cluster2 | SCN3B    |
| ENSG00000174667 | cluster2 | OR7D4    |
| ENSG00000182134 | cluster2 | TDRKH    |
| ENSG00000174500 | cluster2 | GCSAM    |
| ENSG00000013016 | cluster2 | EHD3     |
| ENSG00000235173 | cluster2 | HGH1     |
| ENSG00000180336 | cluster2 | MEIOC    |
| ENSG00000148143 | cluster2 | ZNF462   |
| ENSG00000100767 | cluster2 | PAPLN    |
| ENSG00000186812 | cluster2 | ZNF397   |
| ENSG00000197557 | cluster2 | TTC30A   |
| ENSG00000149292 | cluster2 | TTC12    |
| ENSG00000172006 | cluster2 | ZNF554   |
| ENSG00000118412 | cluster2 | CASP8AP2 |
| ENSG00000165905 | cluster2 | LARGE2   |
| ENSG00000116497 | cluster2 | S100PBP  |
| ENSG00000175155 | cluster2 | YPEL2    |
| ENSG00000167740 | cluster2 | CYB5D2   |
| ENSG00000145700 | cluster2 | ANKRD31  |
| ENSG00000112812 | cluster2 | PRSS16   |

|                 |          |              |
|-----------------|----------|--------------|
| ENSG00000173809 | cluster2 | TDRD12       |
| ENSG00000140479 | cluster2 | PCSK6        |
| ENSG00000162139 | cluster2 | NEU3         |
| ENSG00000157881 | cluster2 | PANK4        |
| ENSG00000125686 | cluster2 | MED1         |
| ENSG00000274810 | cluster2 | NPHP3-ACAD11 |
| ENSG00000148468 | cluster2 | FAM171A1     |
| ENSG00000137070 | cluster2 | IL11RA       |
| ENSG00000101638 | cluster2 | ST8SIA5      |
| ENSG00000163482 | cluster2 | STK36        |
| ENSG00000126790 | cluster2 | L3HYPDH      |
| ENSG00000113522 | cluster2 | RAD50        |
| ENSG00000163840 | cluster2 | DTX3L        |
| ENSG00000115641 | cluster2 | FHL2         |
| ENSG00000253953 | cluster2 | PCDHGB4      |
| ENSG00000196284 | cluster2 | SUPT3H       |
| ENSG00000111667 | cluster2 | USP5         |
| ENSG00000167196 | cluster2 | FBXO22       |
| ENSG00000083814 | cluster2 | ZNF671       |
| ENSG00000112183 | cluster2 | RBM24        |
| ENSG00000114735 | cluster2 | HEMK1        |
| ENSG00000116205 | cluster2 | TCEANC2      |
| ENSG00000152465 | cluster2 | NMT2         |
| ENSG00000276231 | cluster2 | PIK3R6       |
| ENSG00000121807 | cluster2 | CCR2         |
| ENSG00000103351 | cluster2 | CLUAP1       |
| ENSG00000158286 | cluster2 | RNF207       |
| ENSG00000146453 | cluster2 | PNLDC1       |
| ENSG00000148357 | cluster2 | HMCN2        |
| ENSG00000016391 | cluster2 | CHDH         |
| ENSG00000171517 | cluster2 | LPAR3        |
| ENSG00000198488 | cluster2 | B3GNT6       |
| ENSG00000159905 | cluster2 | ZNF221       |
| ENSG00000154928 | cluster2 | EPHB1        |
| ENSG00000176399 | cluster2 | DMRTA1       |
| ENSG00000178826 | cluster2 | TMEM139      |
| ENSG00000135960 | cluster2 | EDAR         |
| ENSG00000166394 | cluster2 | CYB5R2       |
| ENSG00000143257 | cluster2 | NR1I3        |
| ENSG00000135476 | cluster2 | ESPL1        |
| ENSG00000006534 | cluster2 | ALDH3B1      |
| ENSG00000172987 | cluster2 | HPSE2        |
| ENSG00000106336 | cluster2 | FBXO24       |
| ENSG00000124104 | cluster2 | SNX21        |
| ENSG00000233757 | cluster2 |              |
| ENSG00000142675 | cluster2 | CNKSRI       |
| ENSG00000203797 | cluster2 | DDO          |
| ENSG00000102967 | cluster2 | DHODH        |
| ENSG00000146242 | cluster2 | TPBG         |
| ENSG00000167524 | cluster2 | RSKR         |

|                 |          |           |
|-----------------|----------|-----------|
| ENSG00000221926 | cluster2 | TRIM16    |
| ENSG00000171872 | cluster2 | KLF17     |
| ENSG00000181264 | cluster2 | TLCD5     |
| ENSG00000168246 | cluster2 | UBTD2     |
| ENSG00000198894 | cluster2 | CIPC      |
| ENSG00000009724 | cluster2 | MASP2     |
| ENSG00000256806 | cluster2 | C17orf100 |
| ENSG00000136997 | cluster2 | MYC       |
| ENSG00000196639 | cluster2 | HRH1      |
| ENSG00000104783 | cluster2 | KCNN4     |
| ENSG00000160593 | cluster2 | JAML      |
| ENSG00000049089 | cluster2 | COL9A2    |
| ENSG00000148814 | cluster2 | LRRC27    |
| ENSG00000116991 | cluster2 | SIPA1L2   |
| ENSG00000155393 | cluster2 | HEATR3    |
| ENSG00000163755 | cluster2 | HPS3      |
| ENSG00000035403 | cluster2 | VCL       |
| ENSG00000156787 | cluster2 | TBC1D31   |
| ENSG00000147471 | cluster2 | PLPBP     |
| ENSG00000125703 | cluster2 | ATG4C     |
| ENSG00000237651 | cluster2 | C2orf74   |
| ENSG00000186409 | cluster2 | CCDC30    |
| ENSG00000188822 | cluster2 | CNR2      |
| ENSG00000180626 | cluster2 | ZNF594    |
| ENSG00000186687 | cluster2 | LYRM7     |
| ENSG00000166801 | cluster2 | FAM111A   |
| ENSG00000134318 | cluster2 | ROCK2     |
| ENSG00000238227 | cluster2 | TMEM250   |
| ENSG00000010292 | cluster2 | NCAPD2    |
| ENSG00000111671 | cluster2 | SPSB2     |
| ENSG00000164306 | cluster2 | PRIMPOL   |
| ENSG00000143457 | cluster2 | GOLPH3L   |
| ENSG00000141161 | cluster2 | UNC45B    |
| ENSG00000149308 | cluster2 | NPAT      |
| ENSG00000178252 | cluster2 | WDR6      |
| ENSG00000131374 | cluster2 | TBC1D5    |
| ENSG00000135446 | cluster2 | CDK4      |
| ENSG00000084774 | cluster2 | CAD       |
| ENSG00000253729 | cluster2 | PRKDC     |
| ENSG00000154743 | cluster2 | TSEN2     |
| ENSG00000140575 | cluster2 | IQGAP1    |
| ENSG00000149582 | cluster2 | TMEM25    |
| ENSG00000100342 | cluster2 | APOL1     |
| ENSG00000136100 | cluster2 | VPS36     |
| ENSG00000267680 | cluster2 | ZNF224    |
| ENSG00000059573 | cluster2 | ALDH18A1  |
| ENSG00000138442 | cluster2 | WDR12     |
| ENSG00000253352 | cluster2 | TUG1      |
| ENSG00000186814 | cluster2 | ZSCAN30   |
| ENSG00000159023 | cluster2 | EPB41     |



|                 |          |          |
|-----------------|----------|----------|
| ENSG00000161551 | cluster2 | ZNF577   |
| ENSG00000156521 | cluster2 | TYSND1   |
| ENSG00000142230 | cluster2 | SAE1     |
| ENSG00000165819 | cluster2 | METTL3   |
| ENSG00000103064 | cluster2 | SLC7A6   |
| ENSG00000125814 | cluster2 | NAPB     |
| ENSG00000147955 | cluster2 | SIGMAR1  |
| ENSG00000085719 | cluster2 | CPNE3    |
| ENSG00000169871 | cluster2 | TRIM56   |
| ENSG00000164062 | cluster2 | APEH     |
| ENSG00000125384 | cluster2 | PTGER2   |
| ENSG00000106351 | cluster2 | AGFG2    |
| ENSG00000145439 | cluster2 | CBR4     |
| ENSG00000196329 | cluster2 | GIMAP5   |
| ENSG00000136040 | cluster2 | PLXNC1   |
| ENSG00000130313 | cluster2 | PGLS     |
| ENSG00000034693 | cluster2 | PEX3     |
| ENSG00000112367 | cluster2 | FIG4     |
| ENSG00000165275 | cluster2 | TRMT10B  |
| ENSG00000128394 | cluster2 | APOBEC3F |
| ENSG00000167257 | cluster2 | RNF214   |
| ENSG00000169220 | cluster2 | RGS14    |
| ENSG00000162600 | cluster2 | OMA1     |
| ENSG00000136631 | cluster2 | VPS45    |
| ENSG00000003056 | cluster2 | M6PR     |
| ENSG00000104983 | cluster2 | CCDC61   |
| ENSG00000243943 | cluster2 | ZNF512   |
| ENSG00000186517 | cluster2 | ARHGAP30 |
| ENSG00000179583 | cluster2 | CIITA    |
| ENSG00000130303 | cluster2 | BST2     |
| ENSG00000124523 | cluster2 | SIRT5    |
| ENSG00000168310 | cluster2 | IRF2     |
| ENSG00000068784 | cluster2 | SRBD1    |
| ENSG00000109854 | cluster2 | HTATIP2  |
| ENSG00000163219 | cluster2 | ARHGAP25 |
| ENSG00000160049 | cluster2 | DFFA     |
| ENSG00000114988 | cluster2 | LMAN2L   |
| ENSG00000144026 | cluster2 | ZNF514   |
| ENSG00000181896 | cluster2 | ZNF101   |
| ENSG00000073849 | cluster2 | ST6GAL1  |
| ENSG00000178927 | cluster2 | CYBC1    |
| ENSG00000159618 | cluster2 | ADGRG5   |
| ENSG00000243749 | cluster2 | TMEM35B  |
| ENSG00000043462 | cluster2 | LCP2     |
| ENSG00000138629 | cluster2 | UBL7     |
| ENSG00000243667 | cluster2 | DNAAF10  |
| ENSG00000213203 | cluster2 | GIMAP1   |
| ENSG00000107960 | cluster2 | STN1     |
| ENSG00000157637 | cluster2 | SLC38A10 |
| ENSG00000040933 | cluster2 | INPP4A   |

|                 |          |                |
|-----------------|----------|----------------|
| ENSG00000090861 | cluster2 | AARS1          |
| ENSG00000124587 | cluster2 | PEX6           |
| ENSG00000133561 | cluster2 | GIMAP6         |
| ENSG00000166326 | cluster2 | TRIM44         |
| ENSG00000144852 | cluster2 | NR1I2          |
| ENSG00000140006 | cluster2 | WDR89          |
| ENSG00000122224 | cluster2 | LY9            |
| ENSG00000171944 | cluster2 | OR52A5         |
| ENSG00000137700 | cluster2 | SLC37A4        |
| ENSG00000095370 | cluster2 | SH2D3C         |
| ENSG00000111679 | cluster2 | PTPN6          |
| ENSG00000138380 | cluster2 | CARF           |
| ENSG00000125846 | cluster2 | ZNF133         |
| ENSG00000164241 | cluster2 | C5orf63        |
| ENSG00000197077 | cluster2 | KIAA1671       |
| ENSG00000127952 | cluster2 | STYXL1         |
| ENSG00000138172 | cluster2 | CALHM2         |
| ENSG00000265590 | cluster2 | CFAP298-TCP10L |
| ENSG00000128923 | cluster2 | MINDY2         |
| ENSG00000100271 | cluster2 | TTLL1          |
| ENSG00000204842 | cluster2 | ATXN2          |
| ENSG00000166821 | cluster2 | PEX11A         |
| ENSG00000171843 | cluster2 | MLLT3          |
| ENSG00000167094 | cluster2 | TTC16          |
| ENSG00000185379 | cluster2 | RAD51D         |
| ENSG00000149346 | cluster2 | SLX4IP         |
| ENSG00000185518 | cluster2 | SV2B           |
| ENSG00000156958 | cluster2 | GALK2          |
| ENSG00000128487 | cluster2 | SPECC1         |
| ENSG00000178537 | cluster2 | SLC25A20       |
| ENSG00000134539 | cluster2 | KLRD1          |
| ENSG00000122223 | cluster2 | CD244          |
| ENSG00000164088 | cluster2 | PPM1M          |
| ENSG00000156738 | cluster2 | MS4A1          |
| ENSG00000000938 | cluster2 | FGR            |
| ENSG00000168229 | cluster2 | PTGDR          |
| ENSG00000149311 | cluster2 | ATM            |
| ENSG00000162739 | cluster2 | SLAMF6         |
| ENSG00000164483 | cluster2 | SAMD3          |
| ENSG00000186470 | cluster2 | BTN3A2         |
| ENSG00000116791 | cluster2 | CRYZ           |
| ENSG00000165609 | cluster2 | NUDT5          |
| ENSG00000014919 | cluster2 | COX15          |
| ENSG00000105483 | cluster2 | CARD8          |
| ENSG00000140836 | cluster2 | ZFHX3          |
| ENSG00000117281 | cluster2 | CD160          |
| ENSG00000265972 | cluster2 | TXNIP          |
| ENSG00000103653 | cluster2 | CSK            |
| ENSG00000175899 | cluster2 | A2M            |
| ENSG00000147905 | cluster2 | ZCCHC7         |

|                 |          |             |
|-----------------|----------|-------------|
| ENSG00000156990 | cluster2 | RPU3D3      |
| ENSG00000113845 | cluster2 | TIMMDC1     |
| ENSG00000119929 | cluster2 | CUTC        |
| ENSG00000156973 | cluster2 | PDE6D       |
| ENSG00000100442 | cluster2 | FKBP3       |
| ENSG00000117676 | cluster2 | RPS6KA1     |
| ENSG00000151743 | cluster2 | AMN1        |
| ENSG00000107201 | cluster2 | DDX58       |
| ENSG00000236287 | cluster2 | ZBED5       |
| ENSG00000102738 | cluster2 | MRPS31      |
| ENSG00000172086 | cluster2 | KRCC1       |
| ENSG00000139187 | cluster2 | KLRG1       |
| ENSG00000143110 | cluster2 | C1orf162    |
| ENSG00000244509 | cluster2 | APOBEC3C    |
| ENSG00000026751 | cluster2 | SLAMF7      |
| ENSG00000128340 | cluster2 | RAC2        |
| ENSG00000172794 | cluster2 | RAB37       |
| ENSG00000089127 | cluster2 | OAS1        |
| ENSG00000198937 | cluster2 | CCDC167     |
| ENSG00000160856 | cluster2 | FCRL3       |
| ENSG00000177409 | cluster2 | SAMD9L      |
| ENSG00000197057 | cluster2 | DTHD1       |
| ENSG00000169359 | cluster2 | SLC33A1     |
| ENSG00000175567 | cluster2 | UCP2        |
| ENSG00000134202 | cluster2 | GSTM3       |
| ENSG00000176049 | cluster2 | JAKMIP2     |
| ENSG00000254505 | cluster2 | CHMP4A      |
| ENSG00000075292 | cluster2 | ZNF638      |
| ENSG00000139437 | cluster2 | TCHP        |
| ENSG00000160050 | cluster2 | CCDC28B     |
| ENSG00000188321 | cluster2 | ZNF559      |
| ENSG00000119640 | cluster2 | ACYP1       |
| ENSG00000101224 | cluster2 | CDC25B      |
| ENSG00000174600 | cluster2 | CMKLR1      |
| ENSG00000145723 | cluster2 | GIN1        |
| ENSG00000181036 | cluster2 | FCRL6       |
| ENSG00000171596 | cluster2 | NMUR1       |
| ENSG00000227191 | cluster2 | TRGC2       |
| ENSG00000104886 | cluster2 | PLEKHJ1     |
| ENSG00000213809 | cluster2 | KLRK1       |
| ENSG00000185697 | cluster2 | MYBL1       |
| ENSG00000048028 | cluster2 | USP28       |
| ENSG00000197548 | cluster2 | ATG7        |
| ENSG00000141469 | cluster2 | SLC14A1     |
| ENSG00000177225 | cluster2 | GATD1       |
| ENSG00000211695 | cluster2 | TRGV9       |
| ENSG00000171570 | cluster2 | RAB4B-EGLN2 |
| ENSG00000178386 | cluster2 | ZNF223      |
| ENSG00000111885 | cluster2 | MAN1A1      |
| ENSG00000204179 | cluster2 | PTPN20      |

|                 |          |          |
|-----------------|----------|----------|
| ENSG00000144118 | cluster2 | RALB     |
| ENSG00000076351 | cluster2 | SLC46A1  |
| ENSG00000162543 | cluster2 | UBXN10   |
| ENSG00000114346 | cluster2 | ECT2     |
| ENSG00000126822 | cluster2 | PLEKHG3  |
| ENSG00000235750 | cluster2 | KIAA0040 |

Supplementary Figure 2

| Pathway                                                                       | pvalue     | p.adjust   | zScore | logQ       | cond         | Molecules                                                                                                                                                                                                                                                                                                                                                                           |
|-------------------------------------------------------------------------------|------------|------------|--------|------------|--------------|-------------------------------------------------------------------------------------------------------------------------------------------------------------------------------------------------------------------------------------------------------------------------------------------------------------------------------------------------------------------------------------|
| Ceramide Signaling                                                            | 1E-11      | 5,75E-09   | -3.273 | 8,24033216 | obesity      | CNKSRI1,CYCS,DIABLO,MAPK8,NFKB1,NFKB2,NRAS,PIK3CG,PIK3R1,PIK3R6,PPP2R1A,PPP2R1B,RAF1,RALB,RAP2B,RASD1,REL,RELA,RELB,S1PR1,S1PR3,S1PR4,S1PR5,SMPD4,SPHK1,TNFRSF1B                                                                                                                                                                                                                    |
| IL-6 Signaling                                                                | 2,1878E-09 | 1,7971E-07 | -2.449 | 6,7454302  | obesity      | A2M,CD14,CEBPB,COL1A1,CSNK2A2,CXCL8,IL1B,IL6ST,MAP2K3,MAPK8,NFKB1,NFKB2,NFKBID,NRAS,PIK3CG,PIK3R1,PIK3R6,RAF1,RALB,RAP2B,RASD1,REL,RELA,RELB,SOC3,S1PR3,TNFRSF1B                                                                                                                                                                                                                    |
| Autophagy                                                                     | 2,1878E-09 | 1,7971E-07 | -3.569 | 6,7454302  | obesity      | ARL8B,ATG13,ATG16L1,ATG2A,ATG7,ATM,DAPK1,DDIT3,EIF2AK3,EPG5,GABARAPL1,GNAI3,KATS,MAP1LC3A,MAP1LC3B,MAPK8,MYC,NFKB1,NFKB2,PIK2A,PIK3CG,PIK3R1,PIK3R6,PPP2R1A,PPP2R1B,RAF1,RALB,RB1CC1,RIK1,SLC1A5,SLC7A5,SQSTM1,TGFB1,TLR4,TNFRSF1B,ULK1,VP539,WIPI2                                                                                                                                 |
| HMGB1 Signaling                                                               | 5,2481E-09 | 3,7721E-07 | -3.962 | 6,42342214 | obesity      | CNTF,CXCL8,FASLG,HAT1,ICAM1,IFNGR1,IL1B,LIF,MAP2K3,MAPK8,NFKB1,NFKB2,NRAS,OSM,PIK3CG,PIK3R1,PIK3R6,RA C2,RALB,RAP2B,RASD1,REL,RELA,RELB,RHOF,RHOG,TGFB1,TLR4,TNFRSF1B,TNFSF13,TNFSF14,TNFSF9                                                                                                                                                                                        |
| Tumor Microenvironment Pathway                                                | 3,02E-08   | 1,3357E-06 | -3.651 | 5,87427551 | obesity      | COL1A1,CXCL8,FASLG,FGF9,HLA-B,HLA-C,ICAM1,IL1B,ITGA5,ITGB3,MMP9,MYC,NFKB1,NFKB2,NRAS,OSM,PIK3CG,PIK3R1,PIK3R6,PTGS2,RAF1,RALB,RAP2B,RAS D1,REL,RELA,RELB,SLC16A1,SLC14A4,SLC2A1,SLC2A3,TGFB1                                                                                                                                                                                        |
| Unfolded protein response                                                     | 6,6069E-08 | 2,5327E-06 | -3.873 | 5,59642341 | obesity      | CALR,CEBPB,CEBPD,CEBPZ,DDIT3,DNAJA1,DNAJB1,DNAJB11,DNAJB6,EIF2AK3,HSPA14,HSPA5,HSPA9,HSPH1,INSIG1,MAPK8,NFE2L2,PPP1R15A,SREBF1,SREBF2,SYVN1                                                                                                                                                                                                                                         |
| PDF Signaling                                                                 | 4,6774E-07 | 1,3447E-05 | -2.138 | 4,87136215 | obesity      | FASLG,NFKB1,NFKB2,NFKBID,NFKBID,NRAS,PIK3CG,PIK3R1,PIK3R6,PNPLA2,RAF1,RALB,RAP2B,RASD1,REL,RELA,RELB,RO CK2,SOD2                                                                                                                                                                                                                                                                    |
| LPS-stimulated MAPK Signaling                                                 | 5,6234E-07 | 1,4698E-05 | -2.5   | 4,83275484 | obesity      | CD14,MAP2K3,MAPK8,NFKB1,NFKB2,NFKBID,NRAS,PIK3CG,PIK3R1,PIK3R6,RAF1,RALB,RAP2B,RASD1,REL,RELA,RELB,TLR4                                                                                                                                                                                                                                                                             |
| Senescence Pathway                                                            | 6,6069E-07 | 1,6198E-05 | -2.466 | 4,7905434  | obesity      | ANAPC10,ANAPC7,ASXL2,ATF3,ATM,BHLHE40,CAPN10,CAPN5,CCND2,CDC25B,CDK4,CDKN1A,CEBPB,CXCL8,DLAT,DL D,EIF4EBP1,FZR1,GADD45A,GADD45B,GADD45G,MAP2K3,MAPK7,NFKB1,NFKB2,NRAS,PIK3CG,PIK3R1,PIK3R6,PPP2R1A,PP P2R1B,RAD50,RAF1,RALB,RAP2B,RASD1,RNF2,SMAD7,SOD2,SQSTM1,TGFB1                                                                                                                |
| NF-κB Activation by Viruses                                                   | 6,7608E-07 | 1,6198E-05 | -2.84  | 4,7905434  | obesity      | CXCR5,ITGB3,NFKB1,NFKB2,NFKBID,NRAS,PIK3CG,PIK3R1,PIK3R6,RAF1,RALB,RAP2B,RASD1,REL,RELA,RELB,RIK1 1                                                                                                                                                                                                                                                                                 |
| Cardiac Hypertrophy Signaling (Enhanced)                                      | 1,0233E-06 | 2,1014E-05 | -4.808 | 4,67749019 | obesity      | ADRA2B,ADRB1,ADRB2,CNTF,CSF2RB,CXCL8,CXCR1,EDN1,EIF4EBP1,FASLG,FGF9,FGFRL1,GDE1,GNA13,GNA15,GNAI3,IF NLR1,IL10RB,IL11RA,IL1B,IL21R,IL4R,IL6ST,ITGA5,ITGB3,LIF,MAP2K3,MAP3K8,MAPK7,MAPK8,MEF2D,MYC,NFKB1,NFKB 2,NRAS,OSM,PDE3B,PDE4A,PDE4B,PDE4D,PDE6D,PIK3CG,PIK3R1,PIK3R6,PNPLA8,PTGS2,RAF1,RALB,RAP2B,RASD1,REL, RELA,RELB,ROCK2,RPS6KB1,TGFB1,TNFRSF13,TNFSF14,TNFSF9,WNT1,WNT7A |
| TREM1 Signaling                                                               | 2,6303E-06 | 4,4218E-05 | -2.84  | 4,3544002  | obesity      | CASP1,CD83,CD86,CITA,CXCL8,ICAM1,IL1B,ITGA5,NFKB1,NFKB2,NLRP3,REL,RELA,RELB,STAT5A,TLR4,TREM1                                                                                                                                                                                                                                                                                       |
| NGF Signaling                                                                 | 2,6915E-06 | 4,4218E-05 | -2.668 | 4,3544002  | obesity      | MAP3K8,MAPK7,MAPK8,NFKB1,NFKB2,NRAS,PIK3CG,PIK3R1,PIK3R6,RAF1,RALB,RAP2B,RASD1,REL,RELA,RELB,RHOG,RO CK2,RPS6KA1,RPS6KB1,SMPD4,TRAF4                                                                                                                                                                                                                                                |
| IL-8 Signaling                                                                | 3,7154E-06 | 5,7739E-05 | -3.272 | 4,23853388 | obesity      | CCND2,CXCL8,CXCR1,EIF4EBP1,GNA13,GNA15,GNAI3,HMOX1,ICAM1,IQGAP1,ITGB3,MAPK8,MMP9,NFKB1,NFKBID,NRA S,PIK3CG,PIK3R1,PIK3R6,PLD4,PTGS2,RAC2,RAF1,RALB,RAP2B,RASD1,REL,RHOF,RHOG,ROCK2,RPS6KB1                                                                                                                                                                                          |
| Coronavirus Pathogenesis Pathway                                              | 5,1286E-06 | 7,1926E-05 | -2.646 | 4,14311601 | obesity      | ABL1,ADAM9,BST2,CASP1,CCR2,CDK4,CXCL8,DDIT3,DDX58,EIF2AK3,FASLG,FURIN,IL1B,MAPK8,MAVS,NFKB1,NFKB2,NF KBI1,NFKBID,NLRP3,NUP98,OAS1,PTGS2,REL,RELA,RELB,RIK1,RPS16,SIGMAR1,TGFB1                                                                                                                                                                                                      |
| MIF-mediated Glucocorticoid Regulation                                        | 5,4954E-06 | 7,5197E-05 | -2.333 | 4,12380061 | obesity      | CD14,NFKB1,NFKB2,NFKBID,NFKBID,NR3C1,PTGS2,REL,RELA,RELB,TLR4                                                                                                                                                                                                                                                                                                                       |
| LXR/RXR Activation                                                            | 1,4454E-05 | 0,00016623 | 2,324  | 3,77930216 | post-surgery | ABCG1,APOL1,CD14,CYP51A1,FASN,HMGCR,IL1B,LDLR,LV2,MMP9,NFKB1,NFKB2,NR1H2,PTGS2,REL,RELA,RELB,RXRα,SR EBF1,TLR4,TNFRSF1B                                                                                                                                                                                                                                                             |
| Lymphotoxin β Receptor Signaling                                              | 1,8197E-05 | 0,00020122 | -2.121 | 3,6963355  | obesity      | BIRC2,CYCS,DIABLO,NFKB1,NFKB2,NFKBID,PIK3CG,PIK3R1,PIK3R6,RELA,RELB,TNFSF14,TRAF4                                                                                                                                                                                                                                                                                                   |
| HER-2 Signaling in Breast Cancer                                              | 1,8197E-05 | 0,00020122 | -2.646 | 3,6963355  | obesity      | AHCTF1,AREG,CDK4,CDKN1A,COX15,FGR,ITGB3,LYN,MYC,NFKB1,NFKB2,NFKBID,NRAS,NUP54,NUP98,PAR6G, PIK3CG,PIK3R1,PIK3R6,PTGS2,RAF1,RALB,RAP2B,RASD1,REL,RELA,RELB,RHEB,RPS6KB1,YES1                                                                                                                                                                                                         |
| PPAR Signaling                                                                | 2,0417E-05 | 0,00021741 | 2,5    | 3,66272592 | post-surgery | IL1B,MED1,NFKB1,NFKB2,NFKBID,NRAS,PTGS2,RAF1,RALB,RAP2B,RASD1,REL,RELA,RELB,RXRα,SRRA1,STAT5A,TN FRSF1B                                                                                                                                                                                                                                                                             |
| ERK5 Signaling                                                                | 3,02E-05   | 0,00031008 | -2.138 | 3,50852018 | obesity      | FOSL1,GNA13,IL6ST,LIF,MAP3K8,MAPK7,MEF2D,MYC,NRAS,RALB,RAP2B,RASD1,RPS6KA1,RPS6KB1,SGK1                                                                                                                                                                                                                                                                                             |
| Regulation Of The Epithelial Mesenchymal Transition By Growth Factors Pathway | 3,7154E-05 | 0,00035605 | -4.082 | 3,44848341 | obesity      | FASLG,FGF9,FGFRL1,MAP2K3,MAPK8,MMP9,NFKB1,NFKB2,NRAS,PAR6G,PIK3CG,PIK3R1,PIK3R6,RAF1,RALB,RAP2B,RA SD1,REL,RELA,RELB,SMURF1,TGFB1,TNFRSF1B,TNFSF13,TNFSF14,TNFSF9,ZEB2                                                                                                                                                                                                              |
| MIF Regulation of Innate Immunity                                             | 4,5709E-05 | 0,00042391 | -3     | 3,37272384 | obesity      | CD14,MAPK8,NFKB1,NFKB2,NFKBID,NFKBID,PTGS2,REL,RELA,RELB,TLR4                                                                                                                                                                                                                                                                                                                       |
| PI3K Signaling in B Lymphocytes                                               | 4,7863E-05 | 0,00043002 | -3,5   | 3,36651213 | obesity      | ABL1,ATF3,CD79B,IL4R,LYN,NFKB1,NFKB2,NFKBID,NFKBID,NRAS,PIK3CG,PIK3R1,PLEKHA2,PLEKHA3,RAF1,RALB,RAP2B, RASD1,REL,RELA,RELB,TLR4                                                                                                                                                                                                                                                     |
| Hepatic Fibrosis Signaling Pathway                                            | 7,5858E-05 | 0,00063215 | -2.897 | 3,19918125 | obesity      | CEBPB,COL1A1,CSNK1D,CXCL8,EDN1,ETH1,GLI1,GNAI3,ICAM1,IL1B,ITGA5,ITGB3,MAP2K3,MAPK8,MYC,NFKB1,NFKB2,N FKBI1,NFKBID,NRAS,PDCD4,PIK3CG,PIK3R1,PIK3R6,RAC2,RAF1,RALB,RAP2B,RASD1,REL,RELA,RELB,RHOF,RHOG,RIK1,R OCK2,RPS6KB1,SMAD7,SOD2,TFRC,TGFB1,TLR4,TNFRSF1B,TRADD,WNT1,WNT7A                                                                                                       |
| Cholecystokinin/Gastrin-mediated Signaling                                    | 9,3325E-05 | 0,0007351  | -3.153 | 3,13365502 | obesity      | CREM,EPHA4,GNA13,IL1B,MAP2K3,MAPK7,MAPK8,MEF2D,NRAS,PTGS2,PXN,RAC2,RAF1,RALB,RAP2B,RASD1,RHOF,RH OG,ROCK2                                                                                                                                                                                                                                                                           |
| Crosstalk between Dendritic Cells and Natural Killer Cells                    | 0,00010233 | 0,0007742  | -2.111 | 3,11114575 | obesity      | CCR7,CD83,CD86,CSF2RB,FASLG,HLA-B,HLA-C,KLR4-KLRK1/KLRK1,IL1B,NFKB1,NFKB2,REL,RELA,RELB,TLR4,TNFRSF1B                                                                                                                                                                                                                                                                               |
| NRF2-mediated Oxidative Stress Response                                       | 0,00010233 | 0,0007742  | -3.153 | 3,11114575 | obesity      | CD3CA,CUL3,DNAJA1,DNAJB1,DNAJB11,DNAJB6,EIF2AK3,ENC1,FOSL1,ETH1,GSTM3,HMOX1,MAFF,MAP2K3,MAPK7, MAPK8,NFE2L2,NQO2,NRAS,PIK3CG,PIK3R1,PIK3R6,PMF1/PMF1-BGLAP,RAF1,RALB,RAP2B,RASD1,SOD2,SQSTM1,USP14                                                                                                                                                                                  |
| 4-1BB Signaling in T Lymphocytes                                              | 0,00013804 | 0,00095629 | -2.236 | 3,01941025 | obesity      | MAPK8,NFKB1,NFKB2,NFKBID,REL,RELA,RELB,TNFSF9                                                                                                                                                                                                                                                                                                                                       |
| Role of MAPK Signaling in Promoting the Pathogenesis of Influenza             | 0,00014454 | 0,00098944 | -2.357 | 3,00461144 | obesity      | ATPVOC,ATPV0D1,ATPV0E2,ATPV1E1,MAP2K3,MAPK8,NFKB1,NFKB2,NFKBID,NRAS,PNPLA8,PTGS2,RABGE F1,RAF1,RALB,RAP2B,RASD1                                                                                                                                                                                                                                                                     |
| IL-17 Signaling                                                               | 0,00015849 | 0,00104749 | -4,2   | 2,97985141 | obesity      | CEBPB,CNTF,CXCL8,FASLG,IL1B,LIF,MAP2K3,MAPK8,MMP9,NFKB1,NRAS,OSM,PIK3CG,PIK3R1,PIK3R6,PTGS2,RALB,RAP2 B,RASD1,RELA,SGS16,TGFB1,TNFSF13,TNFSF14,TNFSF9                                                                                                                                                                                                                               |
| PDGF Signaling                                                                | 0,00018197 | 0,00116259 | -2.138 | 2,93457466 | obesity      | ABL1,CSNK2A2,INPP5K,INPP1,MAPK8,MYC,NRAS,PIK3CG,PIK3R1,PIK3R6,RAF1,RALB,RAP2B,RASD1,SPHK1                                                                                                                                                                                                                                                                                           |
| Neuroinflammation Signaling Pathway                                           | 0,00020893 | 0,00130581 | -3.889 | 2,88411998 | obesity      | BIRC2,BIRC3,CASP1,CD200R1,CD86,CNTF,CXCL8,FASLG,GLUL,HLA-B,HLA-C,HMOX1,ICAM1,IFNGR1,IL1B,MAPK7,MAPK8,MMP9,NFE2L2,NFKB1,NFKB2,NLRP3,PIK3CG,PIK3R1,PIK3R6,PSEN2,PTGS 2,RAC2,REL,RELA,RELB,RIK1,SOD2,TGFB1,TLR4,WNT1                                                                                                                                                                   |
| Production of Nitric Oxide and Reactive Oxygen Species in Macrophages         | 0,00022387 | 0,00136943 | -2,4   | 2,86346001 | obesity      | APOL1,IFNGR1,IRF8,LV2,MAP3K8,MAPK8,NFKB1,NFKB2,NFKBID,NFKBID,PIK3CG,PIK3R1,PIK3R6,PPP1B,PPP2R1A,PPP2R 1B,PTPN6,RAC2,REL,RELA,RELB,RHOF,RHOG,TLR4,TNFRSF1B                                                                                                                                                                                                                           |
| Apelin Endothelial Signaling Pathway                                          | 0,00031623 | 0,00185542 | -3     | 2,73155823 | obesity      | GNA13,GNA15,GNAI3,ICAM1,MAPK8,MEF2D,NFKB1,NFKB2,NRAS,PIK3CG,PIK3R1,PIK3R6,RAF1,RALB,RAP2B,RASD1,REL, RELA,RELB,RPS6KB1                                                                                                                                                                                                                                                              |
| RANK Signaling in Osteoclasts                                                 | 0,00034674 | 0,00195464 | -2,714 | 2,70893233 | obesity      | BIRC2,BIRC3,MAP3K8,MAPK8,NFKB1,NFKB2,NFKBID,NFKBID,PIK3CG,PIK3R1,PIK3R6,RAF1,REL,RELA,RELB                                                                                                                                                                                                                                                                                          |
| Pulmonary Fibrosis Idiopathic Signaling Pathway                               | 0,00035481 | 0,00196171 | -3,55  | 2,70736549 | obesity      | AREG,COL1A1,COL9A2,EDN1,EIF4EBP1,FGF9,FGFRL1,GLI1,GNA13,IL11RA,IL1B,IL6ST,MAP2K3,MAPK8,MMP9,NFKB1,NF KB2,NRAS,PIK3CG,PIK3R1,PIK3R6,POLR2A,RAF1,RALB,RAP2B,RASD1,REL,RELA,RELB,ROCK2,RPS6KA1,RPS6KB1,TGFB1,T HBS1,WNT1,WNT7A                                                                                                                                                         |
| Glioma Invasiveness Signaling                                                 | 0,00038905 | 0,00211039 | -2,111 | 2,67563802 | obesity      | ITGB3,MMP9,NRAS,PIK3CG,PIK3R1,PIK3R6,PLAUR,RAC2,RALB,RAP2B,RASD1,RHOF,RHOG                                                                                                                                                                                                                                                                                                          |
| Antioxidant Action of Vitamin C                                               | 0,00038905 | 0,00211039 | 3,317  | 2,67563802 | post-surgery | CSF2RB,HMOX1,MAPK8,NFKB1,NFKB2,NFKBID,PLD4,PNPLA8,REL,RELA,RELB,SELENOT,SLC2A1,SLC2A14,SLC2A3, STAT5A                                                                                                                                                                                                                                                                               |
| iNOS Signaling                                                                | 0,00041687 | 0,00224019 | -2,828 | 2,64971593 | obesity      | CD14,IFNGR1,NFKB1,NFKB2,NFKBID,NFKBID,REL,RELA,RELB,TLR4                                                                                                                                                                                                                                                                                                                            |
| Pancreatic Adenocarcinoma Signaling                                           | 0,00057544 | 0,0028772  | -3,207 | 2,54103    | obesity      | ABL1,CDK4,CDKN1A,HMOX1,MAPK8,MMP9,NFKB1,NFKB2,PIK3CG,PIK3R1,PIK3R6,PLD4,PTGS2,RAF1,REL,RELA,RELB,TGF B1                                                                                                                                                                                                                                                                             |
| RAC Signaling                                                                 | 0,00064565 | 0,00320044 | -2,138 | 2,49479014 | obesity      | IQGAP1,ITGA5,ITGB3,MAPK8,NFKB1,NFKB2,NRAS,PIK3CG,PIK3R1,PIK3R6,RAC2,RAF1,RALB,RAP2B,RASD1,REL,RELA,RELB, RPS6KB1                                                                                                                                                                                                                                                                    |
| Colorectal Cancer Metastasis Signaling                                        | 0,00102329 | 0,00459682 | -2,985 | 2,33754212 | obesity      | GNA13,GNA15,GNAI3,IFNGR1,IL6ST,MAPK8,MMP9,MYC,NFKB1,NFKB2,NRAS,PIK3CG,PIK3R1,PIK3R6,PTGER2,PTGER4,P TGS2,RAC2,RALB,RAP2B,RASD1,REL,RELA,RELB,RHOF,RHOG,TGFB1,TLR4,WNT1,WNT7A                                                                                                                                                                                                        |
| Superpathway of Cholesterol Biosynthesis                                      | 0,00138038 | 0,00601304 | -2,646 | 2,22090609 | obesity      | CYP51A1,DHCR7,HMGCR,HMGCS1,IDI1,MVD,SC5D                                                                                                                                                                                                                                                                                                                                            |
| Wound Healing Signaling Pathway                                               | 0,00141254 | 0,00610684 | -3,402 | 2,2141838  | obesity      | CEBPB,CNTF,COL1A1,COL9A2,CXCL8,FASLG,IFNGR1,IL1B,LIF,MAP2K3,MAPK8,MMP9,NFKB1,NFKB2,NFKBID,NFKBID,NRA S,OSM,RAF1,RALB,RAP2B,RASD1,TGFB1,TNFRSF1B,TNFSF13,TNFSF14,TNFSF9,TRADD                                                                                                                                                                                                        |
| Adrenomedullin signaling pathway                                              | 0,00213796 | 0,00847813 | -2,524 | 2,07170016 | obesity      | CEBPB,CSK,CTH,GNA15,IL1B,CNNM4,MAP2K3,MAPK7,MAPK8,NFKB1,NFKB2,NRAS,PIK3CG,PIK3R1,PIK3R6,RAF1,RALB,RA P2B,RASD1,REL,RELA,RELB,RXRα                                                                                                                                                                                                                                                   |
| Role of MAPK Signaling in Inhibiting the Pathogenesis of Influenza            | 0,00213796 | 0,00847813 | -2,309 | 2,07170016 | obesity      | CXCL8,IL1B,MAP2K3,MAPK8,NFKB1,NFKB2,NFKBID,PNPLA8,PTGS2,RAF1,TLR4                                                                                                                                                                                                                                                                                                                   |
| Osteoarthritis Pathway                                                        | 0,00229087 | 0,00902225 | -2,357 | 2,04468501 | obesity      | CASP1,CASP10,CEBPB,CXCL8,DDIT4,EPAS1,GLI1,IL1B,ITGA5,ITGB3,MMP9,NAMPT,NFKB1,NFKB2,PTGS2,REL,RELA,RELB, S100A9,S1PR3,SLC39A8,SMAD7,SPHK1,TGFB1,TLR4,TNFRSF1B                                                                                                                                                                                                                         |

|                                                                           |            |            |        |            |         |                                                                                                                                                                                                                                                                                                                                                                        |
|---------------------------------------------------------------------------|------------|------------|--------|------------|---------|------------------------------------------------------------------------------------------------------------------------------------------------------------------------------------------------------------------------------------------------------------------------------------------------------------------------------------------------------------------------|
| Sphingosine-1-phosphate Signaling                                         | 0,00234423 | 0,0091696  | -3,357 | 2,03764949 | obesity | CASP1,CASP10,GNA13,GNAI3,PIK3CG,PIK3R1,PIK3R6,RAC2,RHOF,RHOG,S1PR1,S1PR3, <b>S1PR4</b> ,S1PR5,SMPD4,SPHK1                                                                                                                                                                                                                                                              |
| Thrombin Signaling                                                        | 0,00245471 | 0,00947287 | -2,357 | 2,02351842 | obesity | ARHGFE3,ARHGFE7, <b>GATA6</b> ,GNA13,GNA15,GNAI3,NFKB1,NFKB2,NRAS,PIK3CG,PIK3R1,PIK3R6,PPP1CB,RAC2,RAF1,RALB,RAP2B,RASD1,REL,RELA,RELB,RHOF,RHOG,ROCK2,RPS6KB1                                                                                                                                                                                                         |
| B Cell Activating Factor Signaling                                        | 0,00380189 | 0,01278415 | -2     | 1,89332827 | obesity | MAPK8,NFKB1,NFKB2,NFKBIB,NFKBID,REL,RELA,RELB                                                                                                                                                                                                                                                                                                                          |
| Hypoxia Signaling in the Cardiovascular System                            | 0,0057544  | 0,01808076 | -2,236 | 1,74278325 | obesity | ATM,CDC34,CSNK1D,EDN1,HIF1AN,LDDA,NFKBIB,NFKBID,UBE2B,UBE2E2,UBE2S                                                                                                                                                                                                                                                                                                     |
| Phagosome Formation                                                       | 0,00707946 | 0,0213125  | -2,889 | 1,67136552 | obesity | ADGRE5,ADGRG5,ADRA2B,ADRB1,ADRB2,AP1G1,CCR2,CCR6,CCR7,CD14,CMKLR1,CNR2,CXCR1,DRD3,F2RL1,FGR,GALR2,GPR132,GPR146,GPR183, <b>GPR35</b> ,HMOX1,HRH1,ITGA5,ITGB3,LPAR3,LPAR5,LTBR42,LYN,MAP2K3,MAPK7,NMUR1,NRAS,P2RY11,PIK3CG,PIK3R1,PIK3R6,PLD4,PNPLA8,PTAFR,PTGDR,PTGER4,RAC2,RAF1,RALB,RAP2B,RASD1,ROCK2,RPS6KB1,S1PR1,S1PR3, <b>S1PR4</b> ,S1PR5,SPHK1,SSTR3,TLR4,YES1 |
| Endoplasmic Reticulum Stress Pathway                                      | 0,00724436 | 0,02169535 | -2,236 | 1,66363338 | obesity | CALR,DDIT3,EIF2AK3,HSPA5,MAPK8                                                                                                                                                                                                                                                                                                                                         |
| Mevalonate Pathway I                                                      | 0,00812831 | 0,02360493 | -2     | 1,62699735 | obesity | HMGCR,HMGCS1,IDI1,MVD                                                                                                                                                                                                                                                                                                                                                  |
| Cardiac Hypertrophy Signaling                                             | 0,00812831 | 0,02360493 | -2,711 | 1,62699735 | obesity | ADRA2B,ADRB1,ADRB2,ADSS2,GNA13,GNA15,GNAI3,MAP2K3,MAP3K8,MAPK8,MEF2D,NRAS,PIK3CG,PIK3R1,PIK3R6,RAC2,RAF1,RALB,RAP2B,RASD1,RHOF,RHOG,ROCK2,RPS6KA1,RPS6KB1,TGFB1                                                                                                                                                                                                        |
| Pulmonary Healing Signaling Pathway                                       | 0,00912011 | 0,02583282 | -2,4   | 1,58782819 | obesity | BMP4,FGR,LYN,MAPK8,MMMP9,MYC,NFKB1,NFKB2,NRAS,RAF1,RALB,RAP2B,RASD1,STAT5A,TGFB1,THBS1,TLR4,TNFRSF1B,WNT1,WNT7A,YES1                                                                                                                                                                                                                                                   |
| MSP-RON Signaling In Cancer Cells Pathway                                 | 0,01047129 | 0,02880856 | -2,138 | 1,54047844 | obesity | CSF2RB,MYC,NFKB1,NFKB2,NRAS,PIK3CG,PIK3R1,PIK3R6, <b>PLAUR</b> ,RAF1,RALB,RAP2B,RASD1,REL,RELA,RELB                                                                                                                                                                                                                                                                    |
| ERBB Signaling                                                            | 0,01096478 | 0,02988033 | -2,111 | 1,52461461 | obesity | AREG,MAP2K3,MAPK8,NRAS,PIK3CG,PIK3R1,PIK3R6,RAF1,RALB,RAP2B,RASD1,RPS6KB1                                                                                                                                                                                                                                                                                              |
| IL-1 Signaling                                                            | 0,0128825  | 0,03429368 | -2,646 | 1,46478591 | obesity | GNA13,GNA15,GNAI3,MAP2K3,MAPK8,NFKB1,NFKB2,NFKBIB,NFKBID,REL,RELA,RELB                                                                                                                                                                                                                                                                                                 |
| CXCR4 Signaling                                                           | 0,01380384 | 0,03607823 | -2,324 | 1,44275484 | obesity | GNA13,GNA15,GNAI3,LYN,MAPK8,NRAS,PIK3CG,PIK3R1,PIK3R6,PNX,RAC2,RAF1,RALB,RAP2B,RASD1,RHOF,RHOG,ROCK2                                                                                                                                                                                                                                                                   |
| Insulin Secretion Signaling Pathway                                       | 0,01412538 | 0,03642193 | -2,353 | 1,43863702 | obesity | AGO2,AGO3,CRTC2,DLAT,DLDD,EIF2AK3,EIF4A3,EIF4EBP1,FGR,FURIN,GNA15,LYN,NAPA,NAPB,NAPG,PABPC1,PIK3CG,PIK3R1,PIK3R6,RPS6KB1,SLC2A1,SLC2A14,SLC2A3,STAT5A,STX16,YES1                                                                                                                                                                                                       |
| Pyridoxal 5'-phosphate Salvage Pathway                                    | 0,01737801 | 0,04363474 | -2,333 | 1,36016764 | obesity | CDK4,CSNK1D, <b>DAPK1</b> ,DYRK1A,MAP2K3,MAP3K8,MAPK7,MAPK8,SGK1                                                                                                                                                                                                                                                                                                       |
| Coronavirus Replication Pathway                                           | 0,01737801 | 0,04363474 | -2,646 | 1,36016764 | obesity | COPB1,TUBA1A,TUBA1B, <b>TUBA1C</b> ,TUBA4A,TUBB2A,TUBB4B                                                                                                                                                                                                                                                                                                               |
| ILK Signaling                                                             | 0,01862087 | 0,04595279 | -2     | 1,33768808 | obesity | ITGB3,MAPK8,MMMP9,MYC,NFKB1,NFKB2,PIK3CG,PIK3R1,PIK3R6,PPP2R1A,PPP2R1B,PTGS2,PNX,RAC2,REL,RELA,RELB,RHOF,RHOG,VCL                                                                                                                                                                                                                                                      |
| Integrin Signaling                                                        | 0,01862087 | 0,04595279 | -2,065 | 1,33768808 | obesity | ABL1,ARHGFE7,CAPN10,CAPN5,ITGA5,ITGB3,MAPK8,NRAS,PIK3CG,PIK3R1,PIK3R6,PPP1CB,PNX,RAC2,RAF1,RALB,RAP2B,RASD1,RHOF,RHOG,VCL                                                                                                                                                                                                                                              |
| Oxytocin Signaling Pathway                                                | 0,02041738 | 0,04912131 | -3,53  | 1,30873006 | obesity | ATP2B4,CAMKK1,CTH,CXCL8,GNA13,GNAI3,MAPK7,MAPK8,NFE2L2,NFKB1,NFKB2,NRAS,PIK3CG,PIK3R1,PIK3R6,PNPLA2,PPP1CB,PTGS2,RAF1,RALB,RAP2B,RASD1,REL,RELA,RELB,ROCK2                                                                                                                                                                                                             |
| Superpathway of Geranylgeranyldiphosphate Biosynthesis I (via Mevalonate) | 0,02041738 | 0,04912131 | -2     | 1,30873006 | obesity | HMGCR,HMGCS1,IDI1,MVD                                                                                                                                                                                                                                                                                                                                                  |
| Ephrin Receptor Signaling                                                 | 0,02137962 | 0,04997269 | -2     | 1,30126726 | obesity | ABI1,ABL1,EPHA4,EPHB1,GNA13,GNA15,GNAI3,ITGA5,ITGB3,NRAS,PIK3CG,PNX,RAC2,RAF1,RALB,RAP2B,RASD1,ROCK2,SDCBP,SH2D3C                                                                                                                                                                                                                                                      |
